# Supplementary material for: Exploration of the Bioactivity of Pigmented Extracts from Streptomyces Strains Isolated along the Banks of the Guaviare and Arauca Rivers (Colombia)
Source: Preprints.org preprint supplement (doi:10.20944/preprints202408.1555.v1), 2024-08-21
Supplement: Supplementary file 1 [file supplementary]

Supplementary material

| Content | | Pages |
| --- | --- | --- |
| Tables S1-S2 | Antioxidant capacity data of the pigmented extracts employing DPPH and ABTS Methods respectively. | 2-3 |
| Tables S3-S5 | Cytotoxicity data of the pigmented extracts against Human Dermal Fibroblasts (HDfa), Cervical cancer cell line (HeLa), and Breast cancer cell line (MCF-7), respectively. | 4-6 |
| Tables S6-S24 | Lists of LC-MS-based annotated compounds (level 3) possibly responsible for the observed bioactivities of the most promising extracts from strains cultured in different media. | 7-14 |
| Figures S1-S15 | Antibiograms of bioactive extracts against bacterial pathogens at different doses. | 15-17 |
| Figures S16-S20 | Dose-response curves for cytotoxic *Streptomyces*-derived extracts against different cells. | 18-19 |
| References | List of cited references | 20-28 |

**Table S1.** Antioxidant capacity of the pigmented extracts employing DPPH Method. Below are the mean values along with their corresponding standard deviations (n=3).

| **Pigmented Extracts** | **DPPH Method** | | | |
| --- | --- | --- | --- | --- |
| **5 ppm** | **50 ppm** | **500 ppm** | **5000 ppm** |
| 2-A | 2.26 ± 0.29 | 2.92 ± 0.21 | 10.85 ± 0.70 | 18.58 ± 0.79 |
| 94-A | 0.10 ± 0.12 | 0.86 ± 0.29 | 3.54 ± 0.22 | 12.30 ± 1.83 |
| 94-C | 0.09 ± 0.04 | 1.36 ± 0.37 | 9.72 ± 0.30 | 17.83 ± 2.39 |
| 144-A | 0.68 ± 0.29 | 1.89 ± 0.12 | 10.75 ± 0.25 | 17.58 ± 1.05 |
| 144-B | NA | 0.94 ± 0.20 | 6.62 ± 0.48 | 24.44 ± 0.98 |
| 144-D | NA | NA | NA | NA |
| 197-C | NA | 1.81 ± 0.15 | 10.18 ± 0.19 | 21.65 ± 2.43 |
| 220-A | NA | NA | 8.26 ± 0.12 | 18.56 ± 0.80 |
| 246-D | NA | NA | NA | NA |
| 247-A | NA | 0.25 ± 0.26 | 6.70 ± 0.36 | 17.60 ± 1.09 |
| 263-A | NA | 0.66 ± 0.44 | 5.36 ± 0.26 | 14.24 ± 1.46 |
| 290-B | NA | 0.97 ± 0.18 | 1.75 ± 0.29 | 4.54 ± 0.30 |
| 308-A | NA | NA | 3.62 ± 0.21 | 19.44 ± 0.18 |
| 356-A | NA | 0.88 ± 0.12 | 12.73 ± 0.00 | 23.85 ± 0.42 |
| 356-D | 0.70 ± 0.06 | NA | 0.25 ± 0.30 | NA |
| 381-A | 0.16 ± 0.18 | 0.33 ± 0.19 | 3.37 ± 0.29 | 8.21 ± 0.92 |
| 443-A | NA | NA | 1.36 ± 0.19 | 15.79 ± 0.38 |
| 626-A | 0.14 ± 0.12 | 0.08 ± 0.07 | 4.91 ± 0.33 | 7.74 ± 0.38 |
| 864-A | 0.02 ± 0.03 | 1.87 ± 0.35 | 21.87 ± 0.57 | 19.79 ± 1.03 |
| 1B18-A | 0.27 ± 0.24 | 0.35 ± 0.00 | 8.06 ± 0.48 | 18.26 ± 1.82 |
| 1B18-C | 0.29 ± 0.15 | 4.01 ± 0.18 | 29.01 ± 0.26 | 23.47 ± 0.22 |
| 1B247-A | 0.08 ±0.09 | 0.20 ± 0.21 | 2.69 ± 0.58 | 8.95 ± 0.75 |
| 3C110-A | NA | 0.96 ± 0.15 | 10.59 ± 0.19 | 18.81 ± 2.38 |
| 4C168-A | NA | NA | 3.47 ± 0.17 | 8.74 ± 1.16 |
| 4C171-B | NA | NA | 0.92 ± 0.63 | 16.40 ± 0.40 |

Pigmented extracts listed according to a code comprising the codified strain (Table 4) hyphenated to the culture medium type, i.e., ISP2 (A) ISP4 (B) modified ISP9 (C) starch nitrate (D). Data expressed as means ± standard deviation (*n* = 3).

**Table S2.** Antioxidant capacity of the pigmented extracts employing ABTS Method. Below are the mean values along with their corresponding standard deviations (n=3)

| **Pigmented Extracts** | **ABTS Method** | | | |
| --- | --- | --- | --- | --- |
| **5 ppm** | **50 ppm** | **500 ppm** | **5000 ppm** |
| 2-A | NA | 3.31 ± 0.06 | 19.53 ± 0.34 | 31.84 ± 0.77 |
| 94-A | NA | 1.66 ± 0.22 | 11.38 ± 0.08 | 30.56 ± 1.61 |
| 94-C | NA | 0.78 ± 0.34 | 16.34 ± 0.37 | 34.70 ± 0.07 |
| 144-A | NA | 3.53 ± 0.62 | 19.66 ± 0.25 | 33.60 ± 0.70 |
| 144-B | NA | 2.41 ± 0.11 | 10.21 ± 0.18 | 16.65 ± 6.35 |
| 144-D | NA | NA | 2.43 ± 0.29 | 8.49 ± 3.73 |
| 197-C | NA | 7.05 ± 0.48 | 20.94 ± 0.17 | 30.61 ± 1.61 |
| 220-A | NA | 1.07 ± 0.41 | 15.34 ± 0.75 | 32.37 ± 0.38 |
| 246-D | NA | NA | 2.32 ± 0.15 | 2.51 ± 2.18 |
| 247-A | NA | 2.30 ± 0.33 | 14.92 ± 0.25 | 34.11 ± 0.30 |
| 263-A | NA | 1.37 ± 0.47 | 12.68 ± 0.33 | 33.12 ± 0.73 |
| 290-B | NA | 0.08 ± 0.13 | 7.49 ± 0.29 | 18.47 ± 3.78 |
| 308-A | NA | 0.91 ± 0.26 | 10.54 ± 0.37 | 32.13 ± 0.57 |
| 356-A | NA | 4.01 ± 0.14 | 26.24 ± 0.13 | 32.57 ± 0.53 |
| 356-D | NA | NA | 0.61 ± 0.11 | 22.98 ± 0.87 |
| 381- A | NA | 1.29 ± 0.06 | 12.13 ± 0.23 | 33.99 ± 0.77 |
| 443-A | NA | 0.41 ± 0.03 | 8.41 ± 0.14 | 32.51 ± 0.76 |
| 626-A | NA | 1.68 ± 0.11 | 27.19 ± 1.05 | 27.29 ± 2.46 |
| 864-A | 0.00 ± 0.01 | 3.62 ± 0.74 | 32.50 ± 0.28 | 34.35 ± 0.30 |
| 1B18-A | NA | 0.91 ± 0.42 | 13.60 ± 0.20 | 32.71 ± 1.34 |
| 1B18-C | 0.17 ± 0.29 | 7.88 ± 0.20 | 34.17 ± 0.14 | 30.84 ± 0.78 |
| 1B247-A | NA | 0.38 ± 0.23 | 8.94 ± 0.32 | 28.21 ± 3.66 |
| 3C110-A | NA | 3.27 ± 5.66 | 18.35 ± 0.37 | 31.47 ± 0.95 |
| 4C168-A | NA | 2.61 ± 0.03 | 11.69 ± 0.49 | 35.00 ± 0.07 |
| 4C171-B | NA | NA | 2.72 ± 0.18 | 7.35 ± 2.23 |

Pigmented extracts listed according to a code comprising the codified strain (Table 4) hyphenated to the culture medium type, i.e., ISP2 (A) ISP4 (B) modified ISP9 (C) starch nitrate (D). Data expressed as means ± standard deviation (*n* = 3).

**Table S3.** Cytotoxicity of the pigmented extracts against Human Dermal Fibroblasts (HDfa). Below are the mean values along with their corresponding standard deviations (n=3)

| **Pigmented Extracts** | **HDFa** | | |
| --- | --- | --- | --- |
| **5 ppm** | **50 ppm** | **500 ppm** |
| 2-A | 99.21 ± 1.12 | 100.00 ± 0.00 | 94.39 ± 2.59 |
| 94-A | 92.27 ± 9.84 | 73.46 ± 5.78 | 87.81 ± 6.81 |
| 94-C | 79.06 ± 5.25 | 81.73 ± 4.14 | 77.85 ± 5.73 |
| 144-A | 89.07 ± 2.29 | 100.00 ± 0.00 | 79.60 ± 2.66 |
| 144-B | 95.87 ± 2.54 | 96.27 ± 4.13 | 55.21 ± 1.33 |
| 144-D | 100.00 ± 0.00 | 100.00 ± 0.00 | 94.06 ± 8.28 |
| 197-C | 59.67 ± 9.58 | 100.00 ± 0.00 | 98.35 ± 2.72 |
| 220-A | 100.00 ± 0.00 | 99.49 ± 0.89 | 96.50 ± 4.79 |
| 246-D | 88.83 ± 2.40 | 83.84 ± 4.03 | 80.86 ± 1.13 |
| 247-A | 87.14 ± 6.25 | 93.47 ± 6.43 | 54.40 ± 4.27 |
| 263-A | 77.19 ± 6.66 | 60.89 ± 8.04 | 71.35 ± 8.30 |
| 290-B | 47.36 ± 1.28 | 44.68 ± 1.85 | 37.65 ± 3.80 |
| 308-A | 92.12 ± 9.36 | 49.30 ± 9.86 | 100.00 ± 0.00 |
| 356-A | 100.00 ± 0.00 | 100.00 ± 0.00 | 100.00 ± 0.00 |
| 356-D | 100.00 ± 0.00 | 100.00 ± 0.00 | 95.88 ± 7.14 |
| 381- A | 71.31 ± 2.74 | 79.05 ± 8.42 | 62.18 ± 3.34 |
| 443-A | 100.00 ± 0.00 | 98.28 ± 2.43 | 92.43 ± 7.93 |
| 626-A | 99.43 ± 0.98 | 100.00 ± 0.00 | 97.42 ± 3.56 |
| 864-A | 91.04 ± 9.01 | 99.90 ± 0.18 | 85.22 ± 2.57 |
| 1B18-A | 85.10 ± 1.79 | 88.74 ± 0.82 | 59.72 ± 2.22 |
| 1B18-C | 94.81 ± 2.93 | 100.00 ± 0.00 | 96.00 ± 3.46 |
| 1B247-A | 81.64 ± 1.66 | 76.09 ± 1.98 | 42.64 ± 1.31 |
| 3C110-A | 90.06 ± 3.58 | 95.87 ± 1.52 | 76.29 ± 4.25 |
| 4C168-A | 84.50 ± 5.50 | 80.77 ± 6.30 | 56.50 ± 0.55 |
| 4C171-B | 86.71 ± 3.93 | 77.18 ± 4.26 | 66.42 ± 2.05 |

Pigmented extracts listed according to a code comprising the codified strain (Table 4) hyphenated to the culture medium type, i.e., ISP2 (A) ISP4 (B) modified ISP9 (C) starch nitrate (D). Data expressed as means ± standard deviation (*n* = 3).

**Table S4.** Cytotoxicity of the pigmented extracts against Cervical cancer cell line (HeLa). Below are the mean values along with their corresponding standard deviations (n=3)

| **Pigmented Extracts** | **HeLa** | | |
| --- | --- | --- | --- |
| **5 ppm** | **50 ppm** | **500 ppm** |
| 2-A | 77.01 ± 5.76 | 89.69 ± 8.39 | 74.77 ± 9.07 |
| 94-A | 86.39 ± 4.70 | 59.82 ± 2.52 | 56.49 ± 4.05 |
| 94-C | 97.71 ± 3.96 | 100.00 ± 0.00 | 100.00 ± 0.00 |
| 144-A | 69.69 ± 2.45 | 71.49 ± 3.40 | 59.67 ± 7.07 |
| 144-B | 100.00 ± 0.00 | 96.89 ± 3.48 | 77.60 ± 1.92 |
| 144-D | 71.60 ± 2.55 | 78.73 ± 1.63 | 71.60 ± 2.66 |
| 197-C | 93.03 ± 3.67 | 94.82 ± 3.95 | 76.92 ± 2.19 |
| 220-A | 95.47 ± 6.22 | 84.63 ±2.20 | 76.97 ± 4.73 |
| 246-D | 49.89 ± 2.62 | 43.07 ± 0.48 | 21.41 ± 2.02 |
| 247-A | 74.18 ± 9.16 | 57.57 ± 5.83 | 50.58 ± 6.74 |
| 263-A | 73.64 ± 6.01 | 85.85 ± 6.23 | 66.40 ± 6.34 |
| 290-B | 49.56 ± 2.67 | 47.26 ± 9.04 | 51.17 ± 2.00 |
| 308-A | 97.00 ± 4.24 | 76.04 ± 1.12 | 73.08 ± 1.90 |
| 356-A | 76.51 ± 0.51 | 67.32 ± 1.01 | 60.66 ± 1.74 |
| 356-D | 74.45 ± 4.43 | 79.10 ± 3.62 | 63.25 ± 3.17 |
| 381- A | 96.13 ± 5.48 | 78.09 ± 3.83 | 59.67 ± 4.83 |
| 626-A | 82.20 ± 4.94 | 84.26 ± 3.50 | 85.05 ± 2.06 |
| 864-A | 84.34 ± 7.51 | 77.07 ± 4.58 | 55.73 ± 3.86 |
| 1B18-A | 99.72 ± 0.49 | 100.00 ± 0.00 | 96.84 ± 3.38 |
| 1B18-C | 99.32 ± 1.17 | 99.42 ± 1.00 | 92.64 ± 7.96 |
| 1B247-A | 100.00 ± 0.00 | 100.00 ± 0.00 | 65.73 ± 5.39 |
| 3C110-A | 100.00 ± 0.00 | 88.54 ± 2.15 | 55.91 ± 3.08 |
| 4C168-A | 76.33 ± 2.73 | 77.01 ± 1.87 | 56.79 ± 1.76 |
| 4C171-B | 50.40 ± 2.91 | 48.92 ± 3.66 | 41.36 ± 4.11 |

Pigmented extracts listed according to a code comprising the codified strain (Table 4) hyphenated to the culture medium type, i.e., ISP2 (A) ISP4 (B) modified ISP9 (C) starch nitrate (D). Data expressed as means ± standard deviation (*n* = 3).

**Table S5.** Cytotoxicity of the pigmented extracts against Breast cancer cell line (MCF-7). Below are the mean values along with their corresponding standard deviations (n=3)

| **Pigmented Extracts** | **MCF-7** | | | |
| --- | --- | --- | --- | --- |
| **5 ppm** | **50 ppm** | **500 ppm** | |
| 2-A | 100.00 ± 0.00 | 100.00 ± 0.00 | | 97.76 ± 3.17 |
| 94-A | 68.76 ± 5.01 | 98.82 ± 0.07 | | 93.93 ± 8.35 |
| 94-C | 86.32 ± 7.03 | 40.52 ± 9.74 | | 87.01 ± 1.74 |
| 144-A | 99.43 ± 0.99 | 100.00 ± 0.00 | | 100.00 ± 0.00 |
| 144-B | 100.00 ± 0.00 | 100.00 ± 0.00 | | 87.95 ± 1.67 |
| 144-D | 78.97 ± 1.86 | 80.01 ± 3.88 | | 83.50 ± 6.57 |
| 197-C | 88.31 ± 3.29 | 88.89 ± 4.00 | | 99.97 ± 0.04 |
| 220-A | 88.29 ± 9.28 | 84.39 ± 2.80 | | 85.68 ± 1.98 |
| 246-D | 30.68 ± 3.89 | 30.05 ± 5.34 | | 30.79 ± 0.65 |
| 247-A | 79.73 ± 3.55 | 87.26 ± 2.23 | | 91.44 ± 7.52 |
| 263-A | 84.60 ± 7.10 | 91.39 ± 9.60 | | 99.39 ± 0.87 |
| 290-B | 72.43 ± 5.99 | 78.21 ± 7.24 | | 49.61 ± 3.74 |
| 308-A | 95.67 ± 5.64 | 98.66 ± 2.32 | | 85.73 ± 2.86 |
| 356-A | 87.63 ± 8.24 | 93.67 ± 3.52 | | 80.12 ± 4.72 |
| 356-D | 95.99 ± 2.87 | 96.72 ± 5.69 | | 73.53 ± 5.91 |
| 381- A | 100.00 ± 0.00 | 88.34 ± 3.45 | | 86.73 ± 1.66 |
| 443-A | 63.74 ± 2.84 | 66.37 ± 5.00 | | 66.14 ± 4.58 |
| 626-A | 82.07 ± 7.29 | 89.34 ± 2.63 | | 95.36 ± 2.61 |
| 864-A | 79.89 ± 8.54 | 88.14 ± 2.84 | | 58.35 ± 1.19 |
| 1B18-A | 94.56 ± 7.91 | 83.95 ± 2.63 | | 92.01 ± 7.22 |
| 1B18-C | 97.87 ± 3.48 | 97.85 ± 3.72 | | 100.00 ± 0.00 |
| 1B247-A | 94.88 ± 8.73 | 100.00 ± 0.00 | | 79.94 ± 3.10 |
| 3C110-A | 63.84 ± 3.38 | 73.52 ± 8.34 | | 94.51 ± 6.56 |
| 4C168-A | 92.44 ± 4.78 | 78.99 ± 5.15 | | 57.38 ± 7.56 |
| 4C171-B | 36.58 ± 3.22 | 37.10 ± 2.66 | | 51.19 ± 7.20 |

Pigmented extracts listed according to a code comprising the codified strain (Table 4) hyphenated to the culture medium type, i.e., ISP2 (A) ISP4 (B) modified ISP9 (C) starch nitrate (D). Data expressed as means ± standard deviation (*n* = 3).

**Table S6.** LC-MS-based annotated compounds (level 3) from StreptomeDB possibly responsible for the cytotoxic activity of the strain S. humi 144 in ISP2.

| **Compound** | **Molecular formula** | **Producer microorganism** | **Ref.** |
| --- | --- | --- | --- |
| jadomycin A | C24H21NO6 | *Streptomyces venezuelae* ISP 5230 | [1] |
| geldanamycin | C29H40N2O9 | *Streptomyces autolyticus* CGMCC 0516 | [2] |
| *Streptomyces hygroscopicus* NRRL 3602 | [3] |
| *Streptomyces melanosporofaciens* EF-76 | [4] |
| glycodeoxycholic acid | C26H45NO4 | *Streptomyces nigra* 452T | [5] |
| griseorhodin A | C25H16O12 | *Streptomyces* sp. JP95 | [6] |
| *Streptomyces puniceus* AB10 | [7] |
| saphenamycin | C23H18N2O5 | *Streptomyces antibioticus* Tü 2706 | [8,9] |
| *Streptomyces* sp. CNB-091 | [10] |
| 3'-hydroxydaidzein | C15H10O5 | *Streptomyces avermitilis* MA-4680 | [11] |
| *Streptomyces cavourensis* YBQ59 | [12] |
| islandicin | C15H10O5 | *Streptomyces purpurascens* | [13] |
| *Streptomyces spinoverrucosus* SNB-032 | [14] |
| terpentecin [15] | C20H28O6 | *Streptomyces griseolosporeus* MF730-N6 | [16,17] |
| [*Streptomyces* S-464](http://132.230.56.4/streptomedb/organism_compounds_results/?organism_id=1640) | [18] |

**Table S7.** LC-MS-based annotated compounds (level 3) from StreptomeDB possibly responsible for the antimicrobial activity of the strain S. noursei 290 extract in ISP4.

| **Compound** | **Molecular formula** | **Producer microorganism** | **Ref.** |
| --- | --- | --- | --- |
| 14-hydroxyclarithromycin | C38H69NO14 | *Streptomyces enissocaesilis* SAS15 | [19] |
| 2-undecylpyrrole | C15H27N | *Streptomyces coelicolor* | [20] |
| aceclidine | C9H15NO2 | *Streptomyces hiroshimensis* | [21] |
| actinorhodin | C32H26O14 | *Streptomyces coelicolor* A3(2) | [22] |
| epithienamycin B | C13H16N2O5S | *Streptomyces olivaceus* | [23] |
| *Streptomyces fulvoviridis* A933 17M9 | [24] |
| formimidoyl-fortimicin A | C18H36N6O6 | *Streptomyces tenjimariensis* | [25] |
| fortimicin A | C17H35N5O6 | *Streptomyces tenjimariensis* | [26] |
| memantine | C12H21N | *Streptomyces hiroshimensis* | [21] |
| pentostatin | C11H16N4O4 | *Streptomyces antibioticus* | [27] |
| petroselaidic acid | C18H34O2 | *Streptomyces chumphonensis* BDK01 | [28] |
| phenazine-1-carboxylate | C13H8N2O2 | *Streptomyces* sp. IFM 11694 | [29] |
| rabelomycin | C19H14O6 | *Streptomyces* sp. XZHG99T | [30] |
| tautomycetin | C33H50O10 | *Streptomyces griseochromogenes* | [31][32] |
| tetracenomycin D1 | C19H12O6 | *Streptomyces* sp. SP9 | [33] |

**Table S8.** LC-MS-based annotated compounds (level 3) from StreptomeDB possibly responsible for the cytotoxicity activity of the strain S. noursei 290 extract in ISP4.

| **Compound** | **Molecular formula** | **Producer microorganism** | **Ref.** |
| --- | --- | --- | --- |
| avermectin A1b  avermectin B1a | C48H72O14 | *Streptomyces avermitilis* | [34] |
| ergosterol | C28H44O | *Streptomyces lividans* | [35] |
| *N*,*N*'-((1Z,3Z)-1,4-bis(4-methoxyphenyl)buta-1,3-diene-2,3-diyl)diformamide | C22H24N2O4 | *Streptomyces peucetius* | [36] |
| pentostatin | C11H16N4O4 | *Streptomyces antibioticus* | [27] |
| phenazine-1-carboxylate | C13H8N2O2 | *Streptomyces* sp. IFM 11694 | [29] |
| rabelomycin | C19H14O6 | *Streptomyces* sp. XZHG99T | [30] |
| tautomycetin | C33H50O10 | *Streptomyces griseochromogenes* | [31,32] |
| tetracenomycin D1 | C19H12O6 | *Streptomyces* sp. SP9 | [33] |
| terpentecin [15] | C20H28O6 | *Streptomyces griseolosporeus* MF730-N6 | [16,17] |
| [*Streptomyces* S-464](http://132.230.56.4/streptomedb/organism_compounds_results/?organism_id=1640) | [18] |

**Table S9.** LC-MS-based annotated compounds (level 3) from StreptomeDB possibly responsible for the antimicrobial activity of the strain S. murinus 246 extract in starch nitrate.

| **Compound** | **Molecular formula** | **Producer microorganism** | **Ref.** |
| --- | --- | --- | --- |
| aflatoxin B1 | C17H12O6 | *Streptomyces roseolus* | [37] |
| arachidic acid | C20H40O2 | *Streptomyces griseoincarnatus* strain HK12 | [38] |
| cephamycin C | C16H22N4O9S | *Streptomyces clavuligerus* | [39] |
| erythromycin | C37H67NO13 | *Streptomyces erythreus*. | [40] |
| lankamycin | C42H72O16 | *Streptomyces rochei* 7434AN4 | [41] |
| maculosin | C14H16N2O3 | *Streptomyces sparsus* VSM-30 | [42] |
| salinomycin | C42H70O11 | *Streptomyces albus* | [43] |
| sisomycin | C19H37N5O7 | *Streptomyces sp. GB-2* | [44] |
| tetracycline | C22H24N2O8 | *Streptomyces aureofaciens* LMG 5968, *S. aureofaciens* 84/25, and *S. aureofaciens* BMK | [45] |
| xantholipin B | C27H18ClNO9 | *Streptomyces flocculus* CGMCC 4.1223 | [46] |

**Table S10.** LC-MS-based annotated compounds (level 3) from StreptomeDB possibly responsible for the cytotoxicity activity of the strain S. murinus 246 extract in starch nitrate.

| **Compound** | **Molecular formula** | **Producer microorganism** | **Ref.** |
| --- | --- | --- | --- |
| fumiformamide | C21H22N2O7S | *Streptomyces peucetius* | [36] |
| maculosin | C14H16N2O3 | *Streptomyces sparsus* VSM-30 | [42] |
| salinomycin | C42H70O11 | *Streptomyces albus* | [43] |
| xantholipin B | C27H18ClNO9 | *Streptomyces flocculus* CGMCC 4.1223 | [46] |

**Table S11.** LC-MS-based annotated compounds (level 3) from StreptomeDB possibly responsible for the antimicrobial activity of the strain S. murinus 4C171 extract in ISP4 medium.

| **Compound** | **Molecular formula** | **Producer microorganism** | **Ref.** |
| --- | --- | --- | --- |
| 8-amino-8-demethylriboflavin | C16H19N5O6 | *Streptomyces davawensis* | [47] |
| actinonin | C19H35N3O5 | *Streptomyces* sp. NHF165 | [48] |
| azithromycin | C38H72N2O12 | *Streptomyces lavendulae* *Subsp. Lavendulae* CCM 3239 | [49] |
| epithienamycin B | C13H16N2O5S | *Streptomyces olivaceus* | [23] |
| epithienamycin F | C13H18N2O8S2 | *Streptomyces flavogriseus* MB 4638 | [50] |
| kanamycin B | C18H37N5O10 | *Streptomyces kanamyceticus* | [51] |
| kanamycin C | C18H36N4O11 | *Streptomyces kanamycetius* | [52] |
| lankamycin | C42H72O16 | *Streptomyces rochei* 7434AN4 | [41] |
| nogalavinone | C21H18O8 | *Streptomyces albus* | [53] |
| petroselaidic acid | C18H34O2 | *Streptomyces chumphonensis* BDK01 | [28] |
| phenazine-1-carboxylate | C13H8N2O2 | *Streptomyces* sp. IFM 11694 | [29] |
| rabelomycin | C19H14O6 | *Streptomyces* sp. XZHG99T | [30] |
| aerobactin | C22H36N4O13 | *Streptomyces nodosus* | [54] |
| aklavinone | C22H20O8 | *Streptomyces purpurascens* | [55] |
| albaflavenone | C15H22O | *Streptomyces spectabilis* NRRL-2792 | [56] |
| β-carboline | C11H8N2 | Streptomyces sp. G248 | [57] |
| atenolol | C14H22N2O3 | *Streptomyces hiroshimensis* | [21] |
| blasticidin S | C17H26N8O5 | *Streptomyces griseochromogenes* | [58] |
| dTDP-L-olivose | C16H24N2O14P2 | *Streptomyces sp.* TA-0256 | [60] |
| filipin III | C35H58O11 | *Streptomyces filipinensis* | [61] |
| genistein 7-O-glucuronide | C21H18O11 | *Streptomyces lanatus* strain AR2 | [62] |
| granaticin | C22H20O10 | *Streptomyces violaceoruber* Tü22 | [63] |
| herbimycin | C30H42N2O9 | *Streptomyces sp.* RM-7-15 | [64] |
| idarubicin | C26H27NO9 | *Streptomyces peucetius var. caesius*. | [65] |
| immunomycin | C43H69NO12 | *Streptomyces hygroscopicus var. ascomyceticus* | [66] |
| lignoceric acid | C24H48O2 | *Streptomyces griseoincarnatus* strainHK12 | [38] |
| manumycin | C31H38N2O7 | *Streptomyces parvulus* | [67] |
| nogalamycin | C39H49NO16 | *Streptomyces nogalater* | [68] |
| norharman | C11H8N2 | *Streptomyces monashensis* sp. nov. (strain MUSC 1JT) | [69] |
| oligomycin A | C45H74O11 | *Streptomyces avermitilis* | [70] |
| oxytetracycline | C22H24N2O9 | *Streptomyces rimosus* M4018 | [71] |
| paromamine | C12H25N3O7 | *Streptomyces lividans* TK24 | [72] |
| pseurotin | C22H25NO8 | *Streptomyces leeuwenhoekii* strain C34 | [73] |
| pyocyanine | C13H10N2O | *Streptomyces* sp. CNB091. | [10] |
| pyrazofurin | C9H13N3O6 | *Streptomyces* candidus NRRL 3601 | [74] |
| resistomycin | C22H16O6 | *Streptomyces aurantiacus* AAA5 | [75] |
| norharman | C11H8N2 | *Streptomyces monashensis* sp. nov. (strain MUSC 1JT) | [69] |
| roseoflavin | C18H23N5O6 | *Streptomyces davawensis* JCM 4913 | [76] |
| sannamycin A | C17H35N5O5 | *Streptomyces tenjimariensis* ATCC 31603 | [77] |
| spectinomycin | C14H24N2O7 | *Streptomyces venezuelae* YJ003 | [78] |
| staurosporine | C28H26N4O3 | *Streptomyces sp.* (172614) | [79] |
| streptothricin F acid | C19H36N8O9 | *Streptomyces qinlingensis* | [80] |
| tetracenomycin C | C23H20O11 | *Streptomyces glaucescens* GLA.O (DSM 40922) | [81] |
| tetracenomycin D3 | C20H12O8 | *Streptomyces olivaceus* TU 2353 | [82] |
| vicenistatin | C30H48N2O4 | *Streptomyces halstedii* | [83] |
| tylosin B | C39H65NO14 | Streptomyces fradiae | [84] |
| urdamycinone B | C25H24O8 | *Streptomyces fradiae* Tü2717 | [85] |
| valclavam | C14H23N3O6 | *Streptomyces clavuligerus* | [86] |

**Table S12.** LC-MS-based annotated compounds (level 3) from StreptomeDB possibly responsible for the antioxidant capacity of the strain S. murinus 4C171 extract in ISP4 medium.

| **Compound** | **Molecular formula** | **Producer microorganism** | **Ref.** |
| --- | --- | --- | --- |
| β-carboline | C11H8N2 | *Streptomyces* sp. G248 | [57] |
| genistein 7-O-glucuronide | C21H18O11 | *Streptomyces lanatus* strain AR2 | [62] |
| lycopene | C40H56 | *Streptomyces globisporus* 4Lcp | [87] |
| nebramycin factor 4 | C19H38N6O11 | *Streptomyces tenebrarius* | [88] |
| norharman | C11H8N2 | *Streptomyces monashensis* sp. nov. (strain MUSC 1JT) | [69] |

**Table S13.** LC-MS-based annotated compounds (level 3) from StreptomeDB possibly responsible for the cytotoxicity activity of the strain S. murinus 4C171 extract in ISP4 medium.

| **Compound** | **Molecular formula** | **Producer microorganism** | **Ref.** |
| --- | --- | --- | --- |
| Ergosterol | C28H44O | *Streptomyces lividans* | [35] |
| *N*,*N*'-((1Z,3Z)-1,4-bis(4-hydroxyphenyl)buta-1,3-diene-2,3-diyl)diformamide | C18H16N2O4 | *Streptomyces peucetius* | [36] |
| rabelomycin | C19H14O6 | *Streptomyces* sp. XZHG99T | [30] |
| aklavinone | C22H20O8 | *Streptomyces purpurascens* | [55] |
| β-carboline | C11H8N2 | *Streptomyces* sp. G248 | [57] |
| cholestenone | C27H44O | *Streptomyces* sp. FX-58 | [89] |
| gliotoxin | C13H14N2O4S2 | *Streptomyces* sp. | [90] |
| granaticin | C22H20O10 | *Streptomyces violaceoruber* Tü22 | [63] |
| holyrine A | C26H24N4O3 | *Streptomyces* sp. NB-A13 | [91] |
| idarubicin | C26H27NO9 | *Streptomyces peucetius var. caesius*. | [65] |
| leinamycin | C22H26N2O6S3 | *Streptomyces atroolivaceus* S-140 | [92] |
| manumycin | C31H38N2O7 | *Streptomyces parvulus* | [67] |
| nogalamycin | C39H49NO16 | *Streptomyces nogalater* | [68] |
| norharman | C11H8N2 | *Streptomyces monashensis* *sp*. nov. (strain MUSC 1JT) | [69] |
| pepsinostreptin | C33H61N5O9 | *Streptomyces sp.* | [93] |
| phoslactomycin B | C25H40NO8P | *Streptomyces platensis SAM-0654* | [94] |
| premithramycinone | C21H18O9 | *Streptomyces argillaceus* | [95] |
| resistomycin | C22H16O6 | *Streptomyces aurantiacus* AAA5 | [75] |
| staurosporine | C28H26N4O3 | *Streptomyces sp.* (172614) | [79] |
| tetracenomycin C | C23H20O11 | *Streptomyces glaucescens* GLA.O (DSM 40922) | [81] |
| vicenistatin | C30H48N2O4 | *Streptomyces halstedii* | [83] |

**Table S14.** LC-MS-based annotated compounds (level 3) from StreptomeDB possibly responsible for the antimicrobial activity of the strain S. fodineus 3C110 extract in ISP2 medium.

| **Compound** | **Molecular formula** | **Producer microorganism** | **Ref.** | |
| --- | --- | --- | --- | --- |
| aflatoxin b1 | C17H12O6 | *Streptomyces roseolus* | [37] | |
| erythromycin | C37H67NO13 | *Streptomyces erythreus*. | [40] | |
| lankamycin | C42H72O16 | *Streptomyces rochei* 7434AN4 | | [41] | |
| penicillin G | C16H18N2O4S | *Streptomyces clavuligerus* | [96] | |
| salinomycin | C42H70O11 | *Streptomyces albus* | [43] | |
| sisomicin | C19H37N5O7 | *Streptomyces sp.* GB-2 | [44] | |
| (+)-epi-isozizaene | C15H24 | *Streptomyces bungoensis* | [97] | |
| (S)-DNPA | C16H14O5 | *Streptomyces coelicolor* | [98] | |
| cyclo(Leu-Phe) | C15H20N2O2 | *Streptomyces noursei* | [99] | |
| mocimycin | C43H60N2O12 | *Streptomyces sp. CB00686* | [100] | |

**Table S15.** LC-MS-based annotated compounds (level 3) possibly responsible for the cytotoxicity activity of the strain S. fodineus 3C110 extract in ISP2 medium.

| **Compound** | **Molecular formula** | **Producer microorganism** | **Ref.** |
| --- | --- | --- | --- |
| salinomycin | C42H70O11 | *Streptomyces albus* | [43] |
| 3-dehydroshikimate | C7H7O5 | *Streptomyces pactum* | [101] |
| thiolutin | C8H8N2O2S2 | Streptomyces albus | [102] |

**Table S16.** LC-MS-based annotated compounds (level 3) from StreptomeDB possibly responsible for the antimicrobial activity of the strain S. hygroscopicus 356 extract in ISP2 medium.

| **Compound** | **Molecular formula** | **Producer microorganism** | **Ref.** |
| --- | --- | --- | --- |
| 2-undecylpyrrole | C15H27N | *Streptomyces coelicolor* | [20] |
| actinonin | C19H35N3O5 | *Streptomyces* sp. NHF165 | [48] |
| albaflavenone | C15H22O | *Streptomyces spectabilis* NRRL-2792 | [56] |
| cephamycin c | C16H22N4O9S | *Streptomyces clavuligerus* | [39] |
| erythromycin | C37H67NO13 | *Streptomyces erythreus*. | [40] |
| formimidoyl-fortimicin A | C18H36N6O6 | *Streptomyces tenjimariensis* | [25] |
| kanamycin B | C18H37N5O10 | *Streptomyces kanamyceticus* | [51] |
| kanamycin C | C18H36N4O11 | *Streptomyces kanamycetius* | [52] |
| lankamycin | C42H72O16 | *Streptomyces rochei* 7434AN4 | [41] |
| lignoceric acid | C24H48O2 | *Streptomyces griseoincarnatus* strain HK12 | [38] |
| maculosin | C14H16N2O3 | *Streptomyces sparsus* VSM-30 | [42] |
| memantine | C12H21N | *Streptomyces hiroshimensis* | [21] |
| paromamine | C12H25N3O7 | *Streptomyces lividans* TK24 | [72] |
| pentostatin | C11H16N4O4 | *Streptomyces antibioticus* | [27] |
| petroselaidic acid | C18H34O2 | *Streptomyces chumphonensis* BDK01 | [28] |
| pyrocoll | C10H6N2O2 | *Streptomyces* sp. AK 409 | [103] |
| salinomycin | C42H70O11 | *Streptomyces albus* | [43] |
| sisomicin | C19H37N5O7 | *Streptomyces sp.* GB-2 | [44] |
| spectinomycin | C14H24N2O7 | *Streptomyces venezuelae* YJ003 | [78] |
| staurosporine | C28H26N4O3 | *Streptomyces sp.* (172614) | [79] |
| terpentecin | C20H28O6 | *Streptomyces griseolosporeus* MF730-N6 | [16,17] |
| 10-deoxymethymycin | C25H43NO6 | *Streptomyces venezuelae* ATCC 15439 | [104] |
| 6-hydroxymellein | C10H10O4 | *Streptomyces sp.* MBT76 | [105] |
| 8-O-methyltetrangulol | C20H14O4 | *Streptomyces sp.* Go-475 | [106] |
| aquayamycin | C25H26O10 | *Streptomyces sp.* A6H*.* | [107] |
| aurachin D | C25H33NO | *Streptomyces sp.* NA04227 | [108] |
| cephalosporin C | C16H21N3O8S | *Streptomyces clavuligerus* | [109] |
| coelichelin | C21H39N7O11 | *Streptomyces coelicolor* | [110] |
| coumermycin A1 | C55H59N5O20 | *Streptomyces rishiriensis* DSM 40489 | [111] |
| cyclooctatin | C20H34O3 | *Streptomyces melanosporofaciens* | [112] |
| dTDP-6-deoxy-D-allose | C16H26N2O15P2 | *Streptomyces bikiniensis* | [113] |
| elloramycin A | C32H36O15 | *Streptomyces olivaceus* | [114] |
| fungichromin | C35H58O12 | *Streptomyces padanus* PMS-702 | [115] |
| indolmycin | C14H15N3O2 | *Streptomyces griseus* ATCC 12648 | [116] |
| isomigrastatin | C27H39NO7 | *Streptomyces platensis* NRRL 18993 | [117] |
| L-2-methyltryptophan | C12H14N2O2 | *Streptomyces laurentii* | [118] |
| methymycin | C25H43NO7 | *Streptomyces venezuelae* ATCC 15439 | [119] |
| neomethymycin |
| lipomycin | C32H45NO9 | *Streptomyces aureofaciens Tü117* | [120] |
| mycothiol | C17H30N2O12S | *Streptomyces coelicolor* | [121] |
| reumycin | C6H5N5O2 | *Streptomyces hiroshimensis* ATCC53615 | [122] |
| scopoletin | C10H8O4 | *Streptomyces sp.* G278 | [123] |
| solanesol | C45H74O | *Streptomyces bacillaris strain* RAM25C4 | [124] |
| spiramycin III | C46H78N2O15 | *Streptomyces spiramyceticus* 16-10-2. | [125] |
| tautomycin | C41H66O13 | *Streptomyces spiroverticillatus* | [126] |
| tobramycin | C18H37N5O9 | *Streptomyces tenebrarius* | [127] |
| urdamycin A | C43H56O17 | *Streptomyces fradiae* | [126] |
| violaceol I | C14H14O5 | *Streptomyces rapamycinicus* | [128] |
| violaceol II |

**Table S17.** LC-MS-based annotated compounds (level 3) from StreptomeDB possibly responsible for the antioxidant capacity of the strain S. hygroscopicus 356 extract in ISP2 medium.

| **Compound** | **Molecular formula** | **Producer microorganism** | **Ref.** |
| --- | --- | --- | --- |
| 2,4-di-tert-butylphenol | C14H22O | *Streptomyces* sp. MUM273b | [129] |
| salinomycin | C42H70O11 | *Streptomyces albus* | [43] |
| cinnamic acid | C9H8O2 | *Streptomyces lividans* | [130] |
| cyclooctatin | C20H34O3 | *Streptomyces melanosporofaciens* | [112] |

**Table S18.** LC-MS-based annotated compounds (level 3) from StreptomeDB possibly responsible for the cytotoxic activity of the strain S. hygroscopicus 356 extract in ISP2 medium.

| **Compound** | **Molecular formula** | **Producer microorganism** | **Ref.** |
| --- | --- | --- | --- |
| maculosin | C14H16N2O3 | *Streptomyces sparsus* VSM-30 | [42] |
| pentostatin | C11H16N4O4 | *Streptomyces antibioticus* | [27] |
| pepsinostreptin | C33H61N5O9 | *Streptomyces sp* | [93] |
| pyrocoll | C10H6N2O2 | *Streptomyces* sp. AK 409 | [103] |
| salinomycin | C42H70O11 | *Streptomyces albus* | [43] |
| staurosporine | C28H26N4O3 | *Streptomyces sp. (172614)* | [79] |
| terpentecin | C20H28O6 | *Streptomyces griseolosporeus* MF730-N6 | [16,17] |
| 8-D-olivosyl-landomycin | C25H24O9 | *Streptomyces cyanogenus S136* | [131] |
| aclacinomycin A | C42H53NO15 | *Streptomyces galilaeus ATCC 31133* | [132] |
| coumermycin A1 | C55H59N5O20 | *Streptomyces rishiriensis DSM 40489* | [111] |
| cyclooctatin | C20H34O3 | *Streptomyces melanosporofaciens* | [112] |
| elloramycin A | C32H36O15 | *Streptomyces olivaceus* | [114] |
| epoxomicin | C28H50N4O7 | *Streptomyces albus J1046* | [133] |
| glycodeoxycholic acid | C26H43NO5 | *Streptomyces nigra sp.nov* | [5] |
| oleandomycin | C35H61NO12 | *Streptomyces antibioticus* | [134] |
| spermidine | C7H19N3 | *Streptomyces nigra sp. nov.* | [5] |
| tautomycin | C41H66O13 | *S. spiroverticillatus* | [126] |
| urdamycin A | C43H56O17 | *S. fradiae* | [126] |

**Table S19.** LC-MS-based annotated compounds (level 3) from StreptomeDB possibly responsible for the cytotoxic activity of the strain S. hygroscopicus 356 extract in starch nitrate medium.

| **Compound** | **Molecular formula** | **Producer microorganism** | **Ref.** |
| --- | --- | --- | --- |
| chartreusin | C32H32O14 | *Streptomyces chartreusis NA02069* | [135] |
| jadomycin A | C24H21NO6 | *Streptomyces venezuelae* ISP 5230 | [1] |
| pentalenolactone | C15H16O5 | *Streptomyces avermitilis* | [136] |

**Table S20.** LC-MS-based annotated compounds (level 3) possibly responsible for the antioxidant capacity of the strain S. misionensis 197 extract in modified ISP9 medium.

| **Compound** | **Molecular formula** | **Producer microorganism** | **Ref.** |
| --- | --- | --- | --- |
| chlorogenic acid | C16H18O9 | *Streptomyces* sp. PM9 | [137] |
| genistein 7-O-glucuronide | C21H18O11 | *Streptomyces lanatus* strain AR2 | [62] |
| caffeic acid | C9H8O4 | *Streptomyces cellulosae strain TES17* | [138] |
| *m*-toluic acid | C8H8O2 | *Streptomyces mangrovisoli sp. nov.* | [139] |

**Table S21.** LC-MS-based annotated compounds (level 3) from StreptomeDB possibly responsible for the cytotoxic activity of the strain S. murinus 443 extract in ISP 2 medium.

| **Compound** | **Molecular formula** | **Producer microorganism** | **Ref.** |
| --- | --- | --- | --- |
| aclacinomycin A | C42H53NO15 | *Streptomyces galilaeus ATCC 31133* | [132] |
| avermectin A1b  avermectin B1a | C48H72O14 | *Streptomyces avermitilis* | [34] |
| cholestenone | C27H44O | *Streptomyces* sp. FX-58 | [89] |
| cyclooctatin | C20H34O3 | *Streptomyces melanosporofaciens* | [112] |
| ergosterol | C28H44O | *Streptomyces lividans* | [35] |
| glycodeoxycholic acid | C26H43NO5 | *Streptomyces nigra sp.nov* | [5] |
| idarubicin | C26H27NO9 | *Streptomyces peucetius var. caesius*. | [65] |
| oleandomycin | C35H61NO12 | *Streptomyces antibioticus* | [134] |
| pentostatin | C11H16N4O4 | *Streptomyces antibioticus* | [27] |
| spermidine | C7H19N3 | *Streptomyces nigra sp. nov.* | [5] |
| staurosporine | C28H26N4O3 | *Streptomyces sp. (172614)* | [79] |
| tautomycin | C41H66O13 | *S. spiroverticillatus* | [126] |
| azatyrosine | C8H10N2O3 | *Streptomyces chibanensis* | [140] |
| leptomycin B | C33H48O6 | *Streptomyces indiaensis MSU5* | [141] |
| nonactin | C40H64O12 | *Streptomyces griseus subsp. griseus* | [142] |
| oligomycin B | C45H72O12 | *Streptomyces strains B8496 and B8739* | [143] |
| Quercetin | C15H10O7 | *Streptomyces albus*, *Streptomyces coelicolor* | [144] |

**Table S22.** LC-MS-based annotated compounds (level 3) from StreptomeDB possibly responsible for the antioxidant capacity of the strain S. murinus 443 extract in ISP 2 medium.

| **Compound** | **Molecular formula** | **Producer microorganism** | **Ref.** |
| --- | --- | --- | --- |
| 2-acetylpyrrole | C6H7NO | Streptomyces sp. MUM273b | [129] |
| cyclooctatin | C20H34O3 | *Streptomyces melanosporofaciens* | [112] |
| lycopene | C40H56 | *Streptomyces globisporus* 4Lcp | [87] |
| quercetin | C15H10O7 | *Streptomyces albus, Streptomyces coelicolor* | [144] |

**Table S23.** LC-MS-based annotated compounds (level 3) from StreptomeDB possibly responsible for the cytotoxic activity of the strain S. lacticiproducens 864 extract in ISP 2 medium.

| **Compound** | **Molecular formula** | **Producer microorganism** | **Ref.** |
| --- | --- | --- | --- |
| 3-dehydroshikimate | C7H7O5 | *Streptomyces pactum* | [101] |
| cyclooctatin | C20H34O3 | *Streptomyces melanosporofaciens* | [112] |
| spermidine | C7H19N3 | *Streptomyces nigra sp. nov.* | [5] |
| thiolutin | C8H8N2O2S2 | Streptomyces albus | [102] |
| 7-epi-*ent*-eudesmane-5,11-diol | C15H28O2 | *Streptomyces anulatus* | [145] |
| aureothin | C22H23NO6 | *Streptomyces thioluteus* | [146] |
| doxorubicinol | C27H31NO11 | *Streptomyces sp. SAS02* | [19] |

**Table S24.** LC-MS-based annotated compounds (level 3) from StreptomeDB possibly responsible for the antioxidant capacity of the strain S. lacticiproducens 864 extract in ISP2 medium.

| **Compound** | **Molecular formula** | **Producer microorganism** | **Ref.** |
| --- | --- | --- | --- |
| cyclooctatin | C20H34O3 | *Streptomyces melanosporofaciens* | [112] |
| methyl hexadecanoate | C17H34O2 | *Streptomyces sp. KX852460* | [147] |
| validamycin A | C20H35NO13 | *Streptomyces hygroscopicus 5008* | [148] |

***S. noursei* 290 in ISP4**


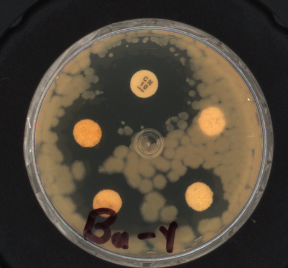


**Figure S1.** Antibiogram of S. noursei 290 in ISP4 against Bacillus subtilis at 30 mg/mL


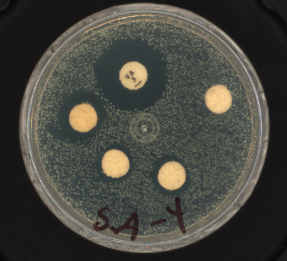


**Figure S2.** Antibiogram of S. noursei 290 in ISP4 against Staphylococcus aureus at 10 mg/mL


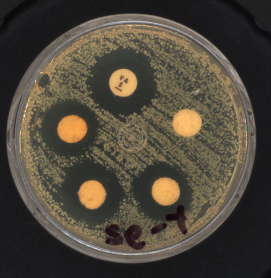


**Figure S3.** Antibiogram of S. noursei 290 in ISP4 against

Staphylococcus epidermidis at 30 mg/mL

***S. murinus* 246 in starch nitrate**


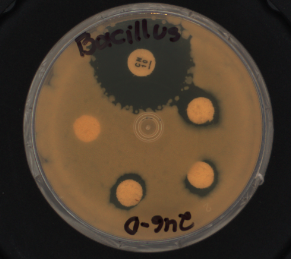


**Figure S4.** Antibiogram of S. murinus 246 in starch nitrate against Bacillus subtilis at 30 mg/mL


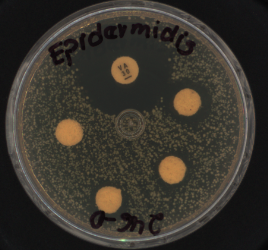


**Figure S5.** Antibiogram of S. murinus 246 in starch nitrate against Staphylococcus epidermidis at 30 mg/mL


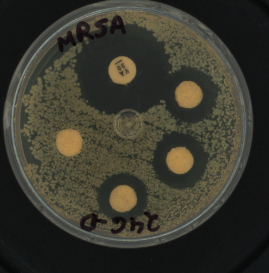


**Figure S6.** Antibiogram of S. murinus 246 in starch nitrate against

Staphylococcus aureus at 30 mg/mL

***S. murinus* 4C171 in ISP 4**


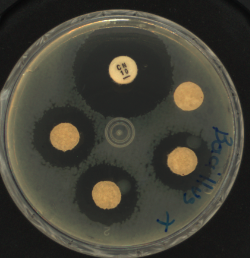


**Figure S7.** Antibiogram of S. murinus 4C171 in ISP4 against Bacillus subtilis at 30 mg/mL


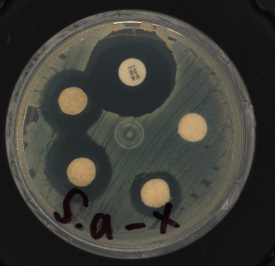


**Figure S8.** Antibiogram of S. murinus 4C171 in ISP4 against Staphylococcus aureus at 30 mg/mL


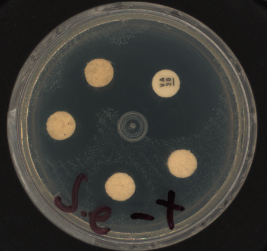


**Figure S9.** Antibiogram of S. murinus 4C171 in ISP4 against

Staphylococcus epidermidis at 30 mg/mL

***S. murinus* 246 in ISP2**


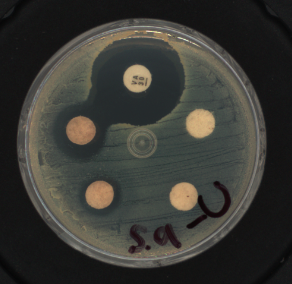


**Figure S10.** Antibiogram of S. murinus 246 in ISP2 against Staphylococcus aureus at 30 mg/mL


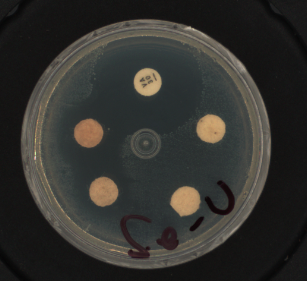


**Figure S11.** Antibiogram of S. murinus246 in ISP2 against Staphylococcus epidermidis at 30 mg/mL

***S. mediolani* 1B247 in ISP2**


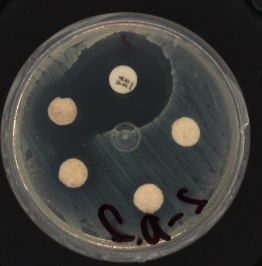


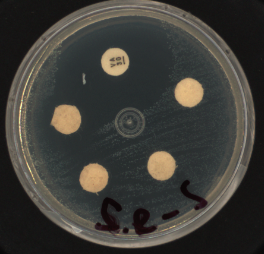


**Figure S12.** Antibiogram of S. mediolani 1B247 in ISP2 against Staphylococcus aureus at 30 mg/mL

**Figure S13.** Antibiogram of S. mediolani 1B247 in ISP2 against Staphylococcus epidermidis at 30 mg/mL

***S. fodineus* 3C110 in ISP 2**


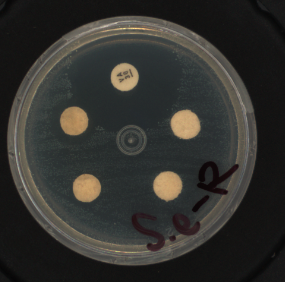


**Figure S14.** Antibiogram of S. fodineus 3C110 in ISP2 against

Staphylococcus epidermidis at 30 mg/mL


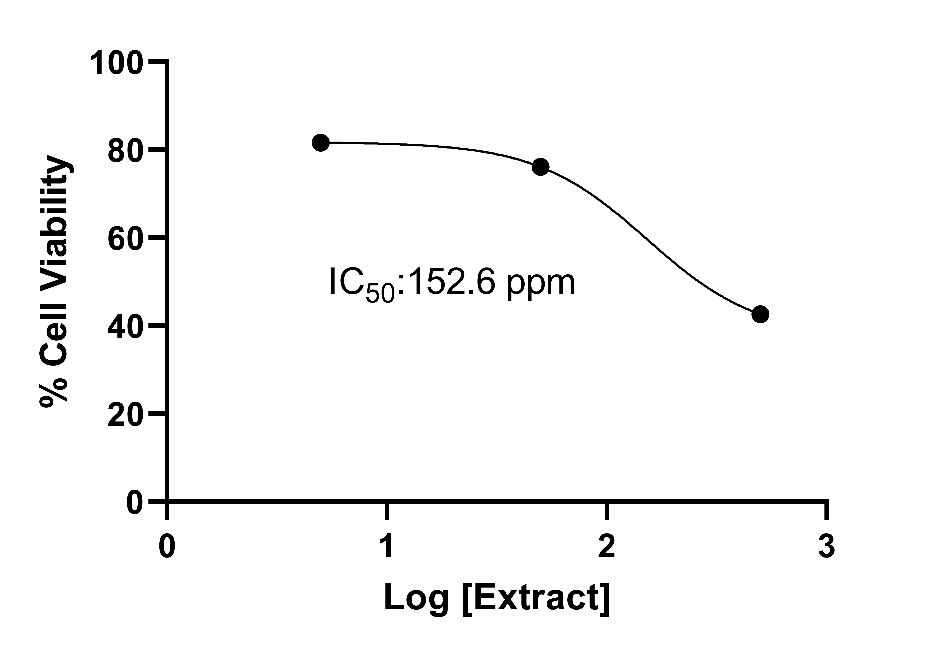


**Figure S15.** Dose-response curves for S. mediolani 1B247 in ISP2 against HDFa.


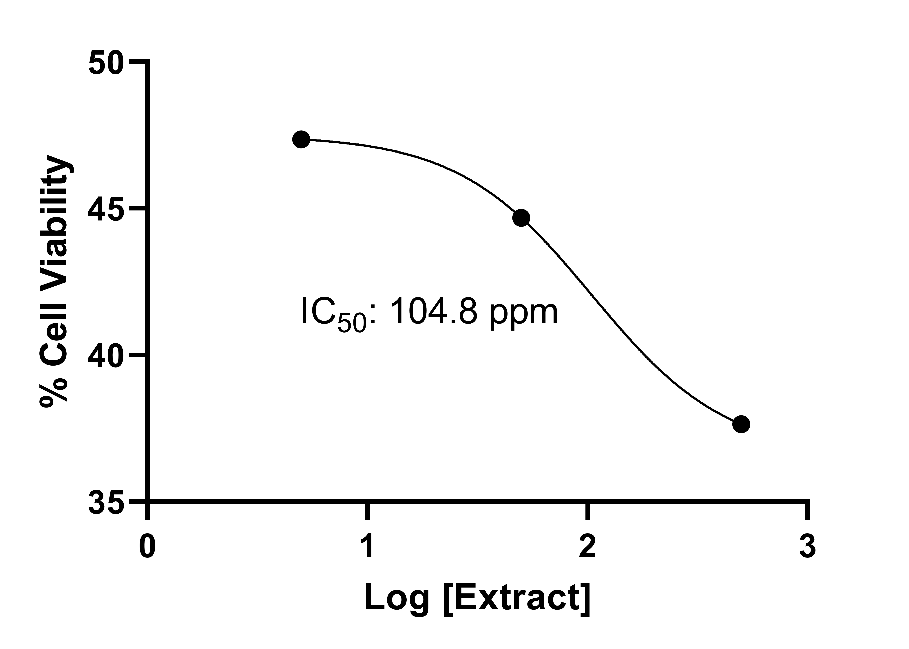


**Figure S16.** Dose-response curves for S. noursei 290 in ISP4 against HDFa.


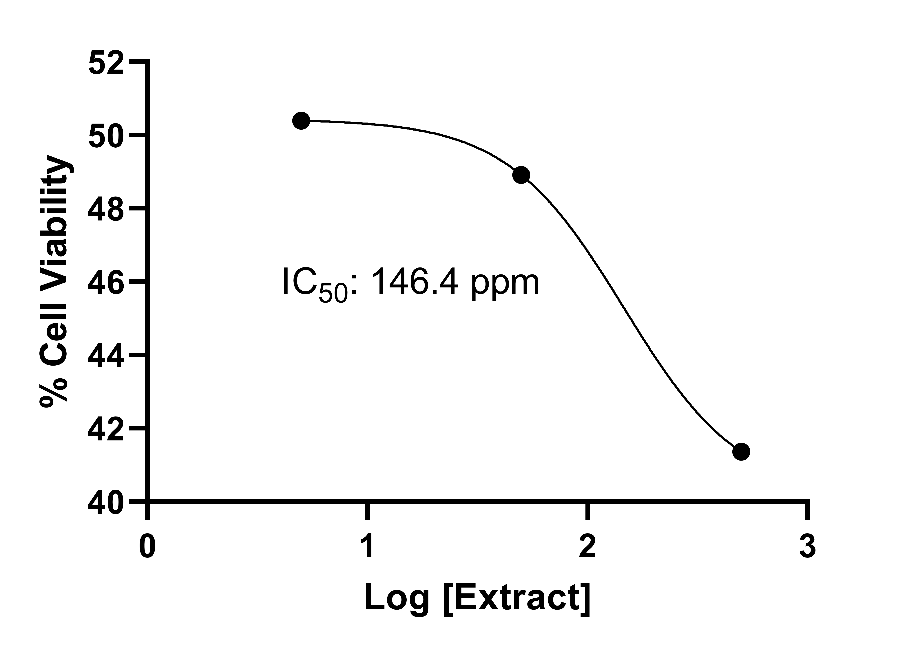


**Figure S17.** Dose-response curves for S. murinus 4C171 in ISP4 against HeLa.


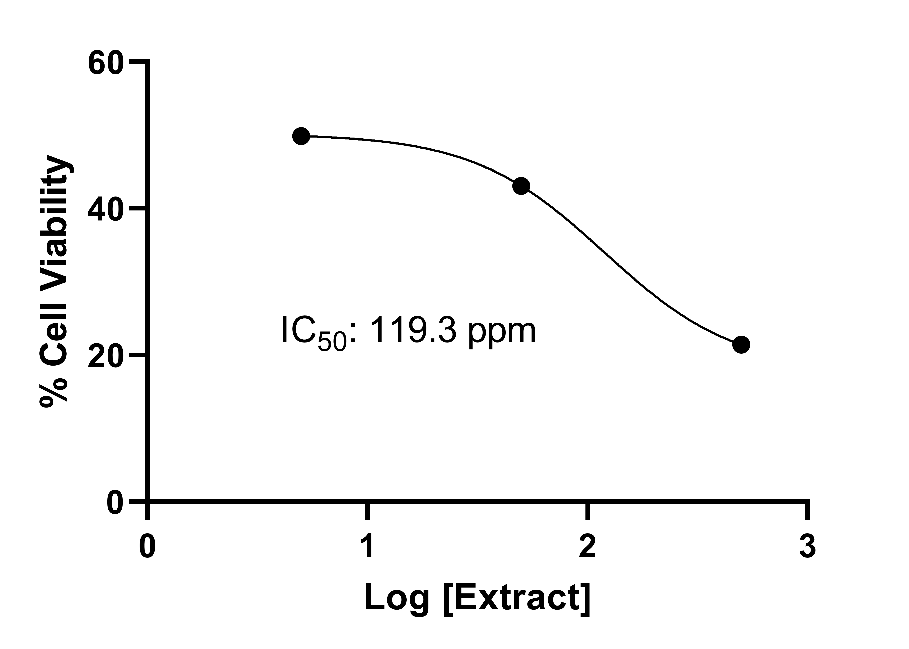


**Figure S18.** Dose-response curves for S. murinus 246 in starch nitrate against HeLa.


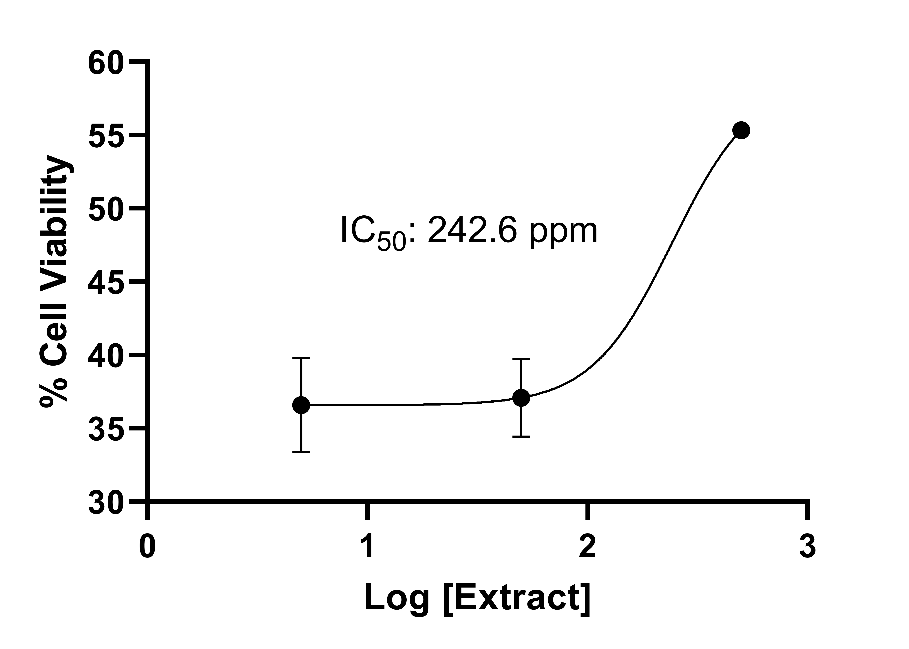


**Figure S19.** Dose-response curves for S. murinus 4C171 in ISP4 against MCF-7.

**References**

1. de Koning, C.B.; Ngwira, K.J.; Rousseau, A.L. Biosynthesis, Synthetic Studies, and Biological Activities of the Jadomycin Alkaloids and Related Analogues. In; 2020; pp. 125–199.

2. Yin, M.; Jiang, M.; Ren, Z.; Dong, Y.; Lu, T. The Complete Genome Sequence of *Streptomyces Autolyticus* CGMCC 0516, the Producer of Geldanamycin, Autolytimycin, Reblastatin and Elaiophylin. *J. Biotechnol.* **2017**, *252*, 27–31, doi:10.1016/j.jbiotec.2017.04.037.

3. Rascher, A.; Hu, Z.; Viswanathan, N.; Schirmer, A.; Reid, R.; Nierman, W.C.; Lewis, M.; Hutchinson, C.R. Cloning and Characterization of a Gene Cluster for Geldanamycin Production in *Streptomyces Hygroscopicus* NRRL 3602. *FEMS Microbiol. Lett.* **2003**, *218*, 223–230, doi:10.1016/S0378-1097(02)01148-5.

4. Beauséjour, J.; Clermont, N.; Beaulieu, C. Effect of *Streptomyces Melanosporofaciens* Strain EF-76 and of Chitosan on Common Scab of Potato. *Plant Soil* **2003**, *256*, 463–468, doi:10.1023/A:1026177714855.

5. Chen, C.; Ye, Y.; Wang, R.; Zhang, Y.; Wu, C.; Debnath, S.C.; Ma, Z.; Wang, J.; Wu, M. *Streptomyces Nigra* Sp. Nov. Is a Novel Actinobacterium Isolated From Mangrove Soil and Exerts a Potent Antitumor Activity in Vitro. *Front. Microbiol.* **2018**, *9*, doi:10.3389/fmicb.2018.01587.

6. Li, A.; Piel, J. A Gene Cluster from a Marine *Streptomyces* Encoding the Biosynthesis of the Aromatic Spiroketal Polyketide Griseorhodin A. *Chem. Biol.* **2002**, *9*, 1017–1026, doi:10.1016/S1074-5521(02)00223-5.

7. Ortega, H.E.; Batista, J.M.; Melo, W.G.P.; Clardy, J.; Pupo, M.T. Absolute Configurations of Griseorhodins A and C. *Tetrahedron Lett.* **2017**, *58*, 4721–4723, doi:10.1016/j.tetlet.2017.11.008.

8. Geiger, A.; Keller-Schierlein, W.; Brandl, M.; Zähner, H. Metabolites of Microorganisms. 247. Phenazines from *Streptomyces Antibioticus*, Strain TUE 2706. *J. Antibiot. (Tokyo).* **1988**, *41*, 1542–1551, doi:10.7164/antibiotics.41.1542.

9. Rui, Z.; Ye, M.; Wang, S.; Fujikawa, K.; Akerele, B.; Aung, M.; Floss, H.G.; Zhang, W.; Yu, T.-W. Insights into a Divergent Phenazine Biosynthetic Pathway Governed by a Plasmid-Born Esmeraldin Gene Cluster. *Chem. Biol.* **2012**, *19*, 1116–1125, doi:10.1016/j.chembiol.2012.07.025.

10. Bauman, K.D.; Li, J.; Murata, K.; Mantovani, S.M.; Dahesh, S.; Nizet, V.; Luhavaya, H.; Moore, B.S. Refactoring the Cryptic Streptophenazine Biosynthetic Gene Cluster Unites Phenazine, Polyketide, and Nonribosomal Peptide Biochemistry. *Cell Chem. Biol.* **2019**, *26*, 724-736.e7, doi:10.1016/j.chembiol.2019.02.004.

11. Pandey, B.P.; Roh, C.; Choi, K.-Y.; Lee, N.; Kim, E.J.; Ko, S.; Kim, T.; Yun, H.; Kim, B.-G. Regioselective Hydroxylation of Daidzein Using P450 (CYP105D7) from *Streptomyces Avermitilis* MA4680. *Biotechnol. Bioeng.* **2010**, n/a-n/a, doi:10.1002/bit.22582.

12. Vu, H.-N.T.; Nguyen, D.T.; Nguyen, H.Q.; Chu, H.H.; Chu, S.K.; Chau, M. Van; Phi, Q.-T. Antimicrobial and Cytotoxic Properties of Bioactive Metabolites Produced by *Streptomyces Cavourensis* YBQ59 Isolated from *Cinnamomum Cassia* Prels in Yen Bai Province of Vietnam. *Curr. Microbiol.* **2018**, *75*, 1247–1255, doi:10.1007/s00284-018-1517-x.

13. Jansson, A.; Niemi, J.; Lindqvist, Y.; Mäntsälä, P.; Schneider, G. Crystal Structure of Aclacinomycin-10-Hydroxylase, a S -Adenosyl- l -Methionine-Dependent Methyltransferase Homolog Involved in Anthracycline Biosynthesis in *Streptomyces Purpurascens*. *J. Mol. Biol.* **2003**, *334*, 269–280, doi:10.1016/j.jmb.2003.09.061.

14. Hu, Y.; Martinez, E.D.; MacMillan, J.B. Anthraquinones from a Marine-Derived *Streptomyces Spinoverrucosus*. *J. Nat. Prod.* **2012**, *75*, 1759–1764, doi:10.1021/np3004326.

15. Tamamura, T.; Sawa, T.; Isshiki, K.; Masuda, T.; Homma, Y.; Iinuma, H.; Naganawa, H.; Hamada, M.; Takeuchi, T.; Umezawa, H. Isolation and Characterization of Terpentecin, a New Antitumor Antibiotic. *J. Antibiot. (Tokyo).* **1985**, *38*, 1664–1669, doi:10.7164/antibiotics.38.1664.

16. Dairi, T.; Motohira, Y.; Itoh, N.; Kuzuyama, T.; Takahashi, S.; Seto, H. Cloning of the Gene Encoding 3-Hydroxy-3-Methylglutaryl Coenzyme A Reductase from Terpenoid Antibiotic-Producing *Streptomyces* Strains. *Mol. Gen. Genet. MGG* **2000**, *262*, 957–964, doi:10.1007/PL00008664.

17. Hamano, Y.; Dairi, T.; Yamamoto, M.; Kuzuyama, T.; Itoh, N.; Seto, H. Growth-Phase Dependent Expression of the Mevalonate Pathway in a Terpenoid Antibiotic-Producing *Streptomyces* Strain. *Biosci. Biotechnol. Biochem.* **2002**, *66*, 808–819, doi:10.1271/bbb.66.808.

18. Kawada, S.-Z.; Yamashita, Y.; Ochiai, K.; Ando, K.; Iwasaki, T.; Takiguchi, T.; Nakano, H. Terpentecin and UCT4B, New Family of Topoisomerase II Targeting Antitumor Antibiotics Produced by *Streptomyces*: Producing Organism, Frementation and Large Scale Purification. *J. Antibiot. (Tokyo).* **1995**, *48*, 211–216, doi:10.7164/antibiotics.48.211.

19. Masand, M.; Sivakala, K.K.; Menghani, E.; Thinesh, T.; Anandham, R.; Sharma, G.; Sivakumar, N.; Jebakumar, S.R.D.; Jose, P.A. Biosynthetic Potential of Bioactive Streptomycetes Isolated From Arid Region of the Thar Desert, Rajasthan (India). *Front. Microbiol.* **2018**, *9*, doi:10.3389/fmicb.2018.00687.

20. Haynes, S.W.; Sydor, P.K.; Stanley, A.E.; Song, L.; Challis, G.L. Role and Substrate Specificity of the *Streptomyces Coelicolor* RedH Enzyme in Undecylprodiginine Biosynthesis. *Chem. Commun.* **2008**, 1865–1867, doi:10.1039/b801677a.

21. Moon, K.; Xu, F.; Zhang, C.; Seyedsayamdost, M.R. Bioactivity-HiTES Unveils Cryptic Antibiotics Encoded in Actinomycete Bacteria. *ACS Chem. Biol.* **2019**, *14*, 767–774, doi:10.1021/acschembio.9b00049.

22. Som, N.F.; Heine, D.; Holmes, N.; Knowles, F.; Chandra, G.; Seipke, R.F.; Hoskisson, P.A.; Wilkinson, B.; Hutchings, M.I. The MtrAB Two-Component System Controls Antibiotic Production in *Streptomyces Coelicolor* A3(2). *Microbiology* **2017**, *163*, 1415–1419, doi:10.1099/mic.0.000524.

23. Box, S.J.; Hood, J.D.; Spear, S.R. Four Further Antibiotics Related to Olivanic Acid Produced by *Streptomyces Olivaceus*: Fermentation, Isolation, Characterisation and Biosynthetic Studies. *J. Antibiot. (Tokyo).* **1979**, *32*, 1239–1247, doi:10.7164/antibiotics.32.1239.

24. Fukagawa, Y.; Okabe, M.; Azuma, S.; Kojima, I.; Ishikura, T.; Kubo, K. Studies on the Biosynthesis of Carbapenem Antibiotics. I. Biosynthetic Significance of the OA-6129 Group of Carbapenem Compounds as the Direct Precursors for PS-5, Epithienamycins A and C and MM 17880. *J. Antibiot. (Tokyo).* **1984**, *37*, 1388–1393, doi:10.7164/antibiotics.37.1388.

25. Morioka, M.; Hotta, K.; Ikeda, D.; Naganawa, H.; Hamada, M.; Okami, Y. 1-Epidactimicin, a New Aminoglycoside Antibiotic Converted from Fortimicin B by a Blocked Mutant of Istamycin-Producing *Streptomyces Tenjimariensis*. *J. Antibiot. (Tokyo).* **1989**, *42*, 831–833, doi:10.7164/antibiotics.42.831.

26. Huong, N.L.; Lee, N.J.; Hwang, H.H.; Son, H. Bin; Kim, H.J.; Seo, E.G.; Hoang, N.H.; Park, J.W. In Vivo Characterization of Phosphotransferase-Encoding Genes IstP and ForP as Interchangeable Launchers of the C3’,4’-Dideoxygenation Biosynthetic Pathway of 1,4-Diaminocyclitol Antibiotics. *J. Microbiol. Biotechnol.* **2019**, *29*, 367–372, doi:10.4014/jmb.1809.09021.

27. Xia, Y.; Luo, F.; Shang, Y.; Chen, P.; Lu, Y.; Wang, C. Fungal Cordycepin Biosynthesis Is Coupled with the Production of the Safeguard Molecule Pentostatin. *Cell Chem. Biol.* **2017**, *24*, 1479-1489.e4, doi:10.1016/j.chembiol.2017.09.001.

28. Manikandan, M.; Gowdaman, V.; Duraimurugan, K.; Prabagaran, S.R. Taxonomic Characterization and Antimicrobial Compound Production from *Streptomyces Chumphonensis* BDK01 Isolated from Marine Sediment. *3 Biotech* **2019**, *9*, 167, doi:10.1007/s13205-019-1687-7.

29. Abdelfattah, M.S.; Ishikawa, N.; Karmakar, U.K.; Yamaku, K.; Ishibashi, M. New Phenazine Analogues from *Streptomyces* Sp. IFM 11694 with TRAIL Resistance-Overcoming Activities. *J. Antibiot. (Tokyo).* **2016**, *69*, 446–450, doi:10.1038/ja.2015.129.

30. Bao, J.; He, F.; Li, Y.; Fang, L.; Wang, K.; Song, J.; Zhou, J.; Li, Q.; Zhang, H. Cytotoxic Antibiotic Angucyclines and Actinomycins from the *Streptomyces* Sp XZHG99T. *J. Antibiot. (Tokyo).* **2018**, *71*, 1018–1024, doi:10.1038/s41429-018-0096-1.

31. Annaval, T.; Han, L.; Rudolf, J.D.; Xie, G.; Yang, D.; Chang, C.-Y.; Ma, M.; Crnovcic, I.; Miller, M.D.; Soman, J.; et al. Biochemical and Structural Characterization of TtnD, a Prenylated FMN-Dependent Decarboxylase from the Tautomycetin Biosynthetic Pathway. *ACS Chem. Biol.* **2018**, *13*, 2728–2738, doi:10.1021/acschembio.8b00673.

32. Yang, D.; Rateb, M.E.; Wang, N.; Shen, B. Competition and Co-Regulation of Spirotoamide and Tautomycetin Biosynthesis in *Streptomyces Griseochromogenes*, and Isolation and Structural Elucidation of Spirotoamide C and D. *J. Antibiot. (Tokyo).* **2017**, *70*, 710–714, doi:10.1038/ja.2017.13.

33. Abdelfattah, M.S.; Elmallah, M.I.Y.; Faraag, A.H.I.; Hebishy, A.M.S.; Ali, N.H. Heliomycin and Tetracinomycin D: Anthraquinone Derivatives with Histone Deacetylase Inhibitory Activity from Marine Sponge-Associated *Streptomyces* Sp. SP9. *3 Biotech* **2018**, *8*, 282, doi:10.1007/s13205-018-1304-1.

34. Guo, J.; Zhang, X.; Lu, X.; Liu, W.; Chen, Z.; Li, J.; Deng, L.; Wen, Y. SAV4189, a MarR-Family Regulator in *Streptomyces Avermitilis*, Activates Avermectin Biosynthesis. *Front. Microbiol.* **2018**, *9*, doi:10.3389/fmicb.2018.01358.

35. Ebrahim, W.; El-Neketi, M.; Lewald, L.-I.; Orfali, R.S.; Lin, W.; Rehberg, N.; Kalscheuer, R.; Daletos, G.; Proksch, P. Metabolites from the Fungal Endophyte *Aspergillus Austroafricanus* in Axenic Culture and in Fungal–Bacterial Mixed Cultures. *J. Nat. Prod.* **2016**, *79*, 914–922, doi:10.1021/acs.jnatprod.5b00975.

36. Zuck, K.M.; Shipley, S.; Newman, D.J. Induced Production of N -Formyl Alkaloids from *Aspergillus Fumigatus* by Co-Culture with *Streptomyces Peucetius*. *J. Nat. Prod.* **2011**, *74*, 1653–1657, doi:10.1021/np200255f.

37. Caceres, I.; Snini, S.; Puel, O.; Mathieu, F. *Streptomyces Roseolus*, A Promising Biocontrol Agent Against Aspergillus Flavus, the Main Aflatoxin B1 Producer. *Toxins (Basel).* **2018**, *10*, 442, doi:10.3390/toxins10110442.

38. Kamarudheen, N.; Rao, K.V.B. Fatty Acyl Compounds from Marine *Streptomyces Griseoincarnatus* Strain HK12 against Two Major Bio-Film Forming Nosocomial Pathogens; an in Vitro and in Silico Approach. *Microb. Pathog.* **2019**, *127*, 121–130, doi:10.1016/j.micpath.2018.11.050.

39. Ayala-Ruano, S.; Santander-Gordón, D.; Tejera, E.; Perez-Castillo, Y.; Armijos-Jaramillo, V. A Putative Antimicrobial Peptide from Hymenoptera in the Megaplasmid PSCL4 of *Streptomyces Clavuligerus* ATCC 27064 Reveals a Singular Case of Horizontal Gene Transfer with Potential Applications. *Ecol. Evol.* **2019**, *9*, 2602–2614, doi:10.1002/ece3.4924.

40. Weber, J.M.; Wierman, C.K.; Hutchinson, C.R. Genetic Analysis of Erythromycin Production in *Streptomyces Erythreus*. *J. Bacteriol.* **1985**, *164*, 425–433, doi:10.1128/jb.164.1.425-433.1985.

41. Nindita, Y.; Cao, Z.; Fauzi, A.A.; Teshima, A.; Misaki, Y.; Muslimin, R.; Yang, Y.; Shiwa, Y.; Yoshikawa, H.; Tagami, M.; et al. The Genome Sequence of *Streptomyces Rochei* 7434AN4, Which Carries a Linear Chromosome and Three Characteristic Linear Plasmids. *Sci. Rep.* **2019**, *9*, 10973, doi:10.1038/s41598-019-47406-y.

42. Managamuri, U.; Vijayalakshmi, M.; Ganduri, V.S.R.K.; Rajulapati, S.B.; Bonigala, B.; Kalyani, B.S.; Poda, S. Isolation, Identification, Optimization, and Metabolite Profiling of *Streptomyces Sparsus* VSM-30. *3 Biotech* **2017**, *7*, 217, doi:10.1007/s13205-017-0835-1.

43. Li, D.; Zhang, J.; Tian, Y.; Tan, H. Enhancement of Salinomycin Production by Ribosome Engineering in *Streptomyces Albus*. *Sci. China Life Sci.* **2019**, *62*, 276–279, doi:10.1007/s11427-018-9474-7.

44. Manivasagan, P.; Kang, K.-H.; Sivakumar, K.; Li-Chan, E.C.Y.; Oh, H.-M.; Kim, S.-K. Marine Actinobacteria: An Important Source of Bioactive Natural Products. *Environ. Toxicol. Pharmacol.* **2014**, *38*, 172–188, doi:10.1016/j.etap.2014.05.014.

45. Hleba, L.; Charousova, I.; Cisarova, M.; Kovacik, A.; Kormanec, J.; Medo, J.; Bozik, M.; Javorekova, S. Rapid Identification of *Streptomyces* Tetracycline Producers by MALDI-TOF Mass Spectrometry. *J. Environ. Sci. Heal. Part A* **2018**, *53*, 1083–1093, doi:10.1080/10934529.2018.1474581.

46. Wu, S.; Huang, T.; Xie, D.; Wo, J.; Wang, X.; Deng, Z.; Lin, S. Xantholipin B Produced by the StnR Inactivation Mutant *Streptomyces Flocculus* CGMCC 4.1223 WJN-1. *J. Antibiot. (Tokyo).* **2017**, *70*, 90–95, doi:10.1038/ja.2016.60.

47. Pedrolli, D.B.; Nakanishi, S.; Barile, M.; Mansurova, M.; Carmona, E.C.; Lux, A.; Gärtner, W.; Mack, M. The Antibiotics Roseoflavin and 8-Demethyl-8-Amino-Riboflavin from *Streptomyces Davawensis* Are Metabolized by Human Flavokinase and Human FAD Synthetase. *Biochem. Pharmacol.* **2011**, *82*, 1853–1859, doi:10.1016/j.bcp.2011.08.029.

48. Yang, N.; Sun, C. The Inhibition and Resistance Mechanisms of Actinonin, Isolated from Marine *Streptomyces* Sp. NHF165, against *Vibrio Anguillarum*. *Front. Microbiol.* **2016**, *7*, doi:10.3389/fmicb.2016.01467.

49. Matulova, M.; Feckova, L.; Novakova, R.; Mingyar, E.; Csolleiova, D.; Zduriencikova, M.; Sedlak, J.; Patoprsty, V.; Sasinkova, V.; Uhliarikova, I.; et al. A Structural Analysis of the Angucycline-Like Antibiotic Auricin from *Streptomyces Lavendulae Subsp. Lavendulae* CCM 3239 Revealed Its High Similarity to Griseusins. *Antibiotics* **2019**, *8*, 102, doi:10.3390/antibiotics8030102.

50. Cassidy, P.J.; Albers-Schonberg, G.; Goegelman, R.T.; Miller, T.; Arison, B.; Stapley, E.O.; Birnbaum, J. Epithienamycins. II. Isolation and Structure Assignment. *J. Antibiot. (Tokyo).* **1981**, *34*, 637–648, doi:10.7164/antibiotics.34.637.

51. Gao, W.; Wu, Z.; Sun, J.; Ni, X.; Xia, H. Modulation of Kanamycin B and Kanamycin A Biosynthesis in *Streptomyces Kanamyceticus* via Metabolic Engineering. *PLoS One* **2017**, *12*, e0181971, doi:10.1371/journal.pone.0181971.

52. Puius, Y.A.; Stievater, T.H.; Srikrishnan, T. Crystal Structure, Conformation, and Absolute Configuration of Kanamycin A. *Carbohydr. Res.* **2006**, *341*, 2871–2875, doi:10.1016/j.carres.2006.09.008.

53. Siitonen, V.; Claesson, M.; Patrikainen, P.; Aromaa, M.; Mäntsälä, P.; Schneider, G.; Metsä-Ketelä, M. Identification of Late-Stage Glycosylation Steps in the Biosynthetic Pathway of the Anthracycline Nogalamycin. *ChemBioChem* **2012**, *13*, 120–128, doi:10.1002/cbic.201100637.

54. Sweeney, P.; Murphy, C.D.; Caffrey, P. Exploiting the Genome Sequence of *Streptomyces Nodosus* for Enhanced Antibiotic Production. *Appl. Microbiol. Biotechnol.* **2016**, *100*, 1285–1295, doi:10.1007/s00253-015-7060-9.

55. Wang, Y.; Niemi, J.; MÃ¤ntsÃ¤lÃ¤, P. Modification of Aklavinone and Aclacinomycins in Vitro and in Vivo by Rhodomycin Biosynthesis Gene Products. *FEMS Microbiol. Lett.* **2002**, *208*, 117–122, doi:10.1111/j.1574-6968.2002.tb11070.x.

56. Sinha, A.; Phillips-Salemka, S.; Niraula, T.-A.; Short, K.A.; Niraula, N.P. The Complete Genomic Sequence of *Streptomyces Spectabilis* NRRL-2792 and Identification of Secondary Metabolite Biosynthetic Gene Clusters. *J. Ind. Microbiol. Biotechnol.* **2019**, *46*, 1217–1223, doi:10.1007/s10295-019-02172-8.

57. Cao; Trinh; Mai; Vu; Le; Thi; Nguyen; Duong; Tran; Chau; et al. Antimicrobial Lavandulylated Flavonoids from a Sponge-Derived *Streptomyces* Sp. G248 in East Vietnam Sea. *Mar. Drugs* **2019**, *17*, 529, doi:10.3390/md17090529.

58. Kang, M.; Doddapaneni, K.; Sarni, S.; Heppner, Z.; Wysocki, V.; Wu, Z. Solution Structure of the Nucleotide Hydrolase BlsM: Implication of Its Substrate Specificity. *Protein Sci.* **2020**, *29*, 1760–1773, doi:10.1002/pro.3812.

59. Deng, L.; Wang, R.; Wang, G.; Liu, M.; Liao, Z.; Liao, G.; Chen, M. Roseosporol A, the First Isolation of a Novel Sesquiterpenoid from *Streptomyces Roseosporus*. *Nat. Prod. Res.* **2019**, *33*, 2038–2043, doi:10.1080/14786419.2018.1484457.

60. Kudo, F.; Yonezawa, T.; Komatsubara, A.; Mizoue, K.; Eguchi, T. Cloning of the Biosynthetic Gene Cluster for Naphthoxanthene Antibiotic FD-594 from *Streptomyces* Sp. TA-0256. *J. Antibiot. (Tokyo).* **2011**, *64*, 123–132, doi:10.1038/ja.2010.145.

61. Payero, T.D.; Vicente, C.M.; Rumbero, Á.; Barreales, E.G.; Santos-Aberturas, J.; de Pedro, A.; Aparicio, J.F. Functional Analysis of Filipin Tailoring Genes from *Streptomyces Filipinensis* Reveals Alternative Routes in Filipin III Biosynthesis and Yields Bioactive Derivatives. *Microb. Cell Fact.* **2015**, *14*, 114, doi:10.1186/s12934-015-0307-4.

62. Riahi, K.; Hosni, K.; Raies, A.; Oliveira, R. Unique Secondary Metabolites of a *Streptomyces* Strain Isolated from Extreme Salty Wetland Show Antioxidant and Antibacterial Activities. *J. Appl. Microbiol.* **2019**, *127*, 1727–1740, doi:10.1111/jam.14428.

63. Ichinose, K.; Bedford, D.J.; Tornus, D.; Bechthold, A.; Bibb, M.J.; Peter Revill, W.; Floss, H.G.; Hopwood, D.A. The Granaticin Biosynthetic Gene Cluster of *Streptomyces Violaceoruber* Tü22: Sequence Analysis and Expression in a Heterologous Host. *Chem. Biol.* **1998**, *5*, 647–659, doi:10.1016/S1074-5521(98)90292-7.

64. Shaaban, K.A.; Wang, X.; Elshahawi, S.I.; Ponomareva, L. V.; Sunkara, M.; Copley, G.C.; Hower, J.C.; Morris, A.J.; Kharel, M.K.; Thorson, J.S. Herbimycins D–F, Ansamycin Analogues from *Streptomyces* Sp. RM-7-15. *J. Nat. Prod.* **2013**, *76*, 1619–1626, doi:10.1021/np400308w.

65. Zhang, Z.; Yu, X.; Wang, Z.; Wu, P.; Huang, J. Anthracyclines Potentiate Anti-Tumor Immunity: A New Opportunity for Chemoimmunotherapy. *Cancer Lett.* **2015**, *369*, 331–335, doi:10.1016/j.canlet.2015.10.002.

66. Wang, P.; Yin, Y.; Wang, X.; Wen, J. Enhanced Ascomycin Production in *Streptomyces Hygroscopicus Var. Ascomyceticus* by Employing Polyhydroxybutyrate as an Intracellular Carbon Reservoir and Optimizing Carbon Addition. *Microb. Cell Fact.* **2021**, *20*, 70, doi:10.1186/s12934-021-01561-y.

67. Solár, P.; Sačková, V.; Hrčková, G.; Demečková, V.; Kassayová, M.; Bojková, B.; Mudroňová, D.; Gancarčíková, S.; Jendželovský, R.; Fedoročko, P. Antitumor Effect of the Combination of Manumycin A and Immodin Is Associated with Antiplatelet Activity and Increased Granulocyte Tumor Infiltration in a 4T1 Breast Tumor Model. *Oncol. Rep.* **2017**, *37*, 368–378, doi:10.3892/or.2016.5265.

68. Torkkell, S.; Kunnari, T.; Palmu, K.; Mäntsälä, P.; Hakala, J.; Ylihonko, K. The Entire Nogalamycin Biosynthetic Gene Cluster of *Streptomyces Nogalater*: Characterization of a 20-Kb DNA Region and Generation of Hybrid Structures. *Mol. Genet. Genomics* **2001**, *266*, 276–288, doi:10.1007/s004380100554.

69. Law, J.W.-F.; Ser, H.-L.; Ab Mutalib, N.-S.; Saokaew, S.; Duangjai, A.; Khan, T.M.; Chan, K.-G.; Goh, B.-H.; Lee, L.-H. *Streptomyces Monashensis* Sp. Nov., a Novel Mangrove Soil Actinobacterium from East Malaysia with Antioxidative Potential. *Sci. Rep.* **2019**, *9*, 3056, doi:10.1038/s41598-019-39592-6.

70. Suroto, D.A.; Kitani, S.; Miyamoto, K.T.; Sakihama, Y.; Arai, M.; Ikeda, H.; Nihira, T. Activation of Cryptic Phthoxazolin A Production in *Streptomyces Avermitilis* by the Disruption of Autoregulator-Receptor Homologue AvaR3. *J. Biosci. Bioeng.* **2017**, *124*, 611–617, doi:10.1016/j.jbiosc.2017.06.014.

71. Wang, L.; Zhao, H.; Yu, L.; Guo, M.; Chu, J.; Zhang, S. [Optimization and application of chemically defined medium for 13C metabolic flux analysis of *Streptomyces rimosus* M4018]. *Sheng Wu Gong Cheng Xue Bao* **2014**, *30*, 679–683.

72. Nepal, K.K.; Oh, T.-J.; Sohng, J.K. Heterologous Production of Paromamine in *Streptomyces Lividans* TK24 Using Kanamycin Biosynthetic Genes from *Streptomyces Kanamyceticus* ATCC12853. *Mol. Cells* **2009**, *27*, 601–608, doi:10.1007/s10059-009-0080-5.

73. Wakefield, J.; Hassan, H.M.; Jaspars, M.; Ebel, R.; Rateb, M.E. Dual Induction of New Microbial Secondary Metabolites by Fungal Bacterial Co-Cultivation. *Front. Microbiol.* **2017**, *8*, doi:10.3389/fmicb.2017.01284.

74. Zhao, G.; Yao, S.; Rothchild, K.W.; Liu, T.; Liu, Y.; Lian, J.; He, H.; Ryan, K.S.; Du, Y. The Biosynthetic Gene Cluster of Pyrazomycin—A C‐Nucleoside Antibiotic with a Rare Pyrazole Moiety. *ChemBioChem* **2020**, *21*, 644–649, doi:10.1002/cbic.201900449.

75. Vijayabharathi, R.; Bruheim, P.; Andreassen, T.; Raja, D.S.; Devi, P.B.; Sathyabama, S.; Priyadarisini, V.B. Assessment of Resistomycin, as an Anticancer Compound Isolated and Characterized from *Streptomyces Aurantiacus* AAA5. *J. Microbiol.* **2011**, *49*, 920–926, doi:10.1007/s12275-011-1260-5.

76. Jankowitsch, F.; Schwarz, J.; Rückert, C.; Gust, B.; Szczepanowski, R.; Blom, J.; Pelzer, S.; Kalinowski, J.; Mack, M. Genome Sequence of the Bacterium *Streptomyces Davawensis* JCM 4913 and Heterologous Production of the Unique Antibiotic Roseoflavin. *J. Bacteriol.* **2012**, *194*, 6818–6827, doi:10.1128/JB.01592-12.

77. Hoang, N.H.; Huong, N.L.; Kim, B.; Sohng, J.K.; Yoon, Y.J.; Park, J.W. Istamycin Aminoglycosides Profiling and Their Characterization in *Streptomyces Tenjimariensis* ATCC 31603 Culture Using High-Performance Liquid Chromatography with Tandem Mass Spectrometry. *J. Sep. Sci.* **2016**, *39*, 4712–4722, doi:10.1002/jssc.201600925.

78. Thapa, L.P.; Oh, T.-J.; Liou, K.; Sohng, J.K. Biosynthesis of Spectinomycin: Heterologous Production of Spectinomycin and Spectinamine in an Aminoglycoside-Deficient Host, *Streptomyces Venezuelae* YJ003. *J. Appl. Microbiol.* **2008**, *105*, 300–308, doi:10.1111/j.1365-2672.2008.03788.x.

79. Li, X.-B.; Tang, J.-S.; Gao, H.; Ding, R.; Li, J.; Hong, K.; Yao, X.-S. A New Staurosporine Analog from Actinomycetes *Streptomyces* Sp. (172614). *J. Asian Nat. Prod. Res.* **2011**, *13*, 765–769, doi:10.1080/10286020.2011.586342.

80. Ji, Z.; Wang, M.; Wei, S.; Zhang, J.; Wu, W. Isolation, Structure Elucidation and Antibacterial Activities of Streptothricin Acids. *J. Antibiot. (Tokyo).* **2009**, *62*, 233–237, doi:10.1038/ja.2009.16.

81. Ortseifen, V.; Kalinowski, J.; Pühler, A.; Rückert, C. The Complete Genome Sequence of the Actinobacterium *Streptomyces Glaucescens* GLA.O (DSM 40922) Carrying Gene Clusters for the Biosynthesis of Tetracenomycin C, 5`-Hydroxy Streptomycin, and Acarbose. *J. Biotechnol.* **2017**, *262*, 84–88, doi:10.1016/j.jbiotec.2017.09.008.

82. Rohr, J.; Eick, S.; Zeeck, A.; Reuschenbach, P.; Zähner, H.; Fiedler, H.-P. Metabolic Products of Microorganisms. 249. Tetracenomycins B3 and D3, Key Intermediates of the Elloramycin and Tetracenomycin C Biosynthesis. *J. Antibiot. (Tokyo).* **1988**, *41*, 1066–1073, doi:10.7164/antibiotics.41.1066.

83. Ogasawara, Y.; Katayama, K.; Minami, A.; Otsuka, M.; Eguchi, T.; Kakinuma, K. Cloning, Sequencing, and Functional Analysis of the Biosynthetic Gene Cluster of Macrolactam Antibiotic Vicenistatin in *Streptomyces Halstedii*. *Chem. Biol.* **2004**, *11*, 79–86, doi:10.1016/j.chembiol.2003.12.010.

84. Vančura, A.; Řezanka, T.; Maršálek, J.; Křišťan, V.; Basařová, G. Fatty Acids and Production of Tylosin-like Compounds in *Streptomyces Fradiae*. *J. Basic Microbiol.* **1987**, *27*, 167–171, doi:10.1002/jobm.3620270312.

85. Trefzer, A.; Hoffmeister, D.; Künzel, E.; Stockert, S.; Weitnauer, G.; Westrich, L.; Rix, U.; Fuchser, J.; Bindseil, K.; Rohr, J.; et al. Function of Glycosyltransferase Genes Involved in Urdamycin A Biosynthesis. *Chem. Biol.* **2000**, *7*, 133–142, doi:10.1016/S1074-5521(00)00079-X.

86. Jensen, S.E. Biosynthesis of Clavam Metabolites. *J. Ind. Microbiol. Biotechnol.* **2012**, *39*, 1407–1419, doi:10.1007/s10295-012-1191-0.

87. Holembiovs’ka, S.L.; Tymoshenko, S.H.; Matseliukh, B.P. [Influence of carbon and nitrogen sources on biosynthesis of lycopene by *Streptomyces globisporus* 4Lcp]. *Mikrobiol. Z.* **2010**, *72*, 46–51.

88. Higgins, C.E.; Kastner, R.E. Nebramycin, a New Broad-Spectrum Antibiotic Complex. II. Description of *Streptomyces Tenebrarius*. *Antimicrob. Agents Chemother.* **1967**, *7*, 324–331.

89. Huang, Y.-F.; Tian, L.; Fu, H.-W.; Hua, H.-M.; Pei, Y.-H. One New Anthraquinone from Marine *Streptomyces* Sp. FX-58. *Nat. Prod. Res.* **2006**, *20*, 1207–1210, doi:10.1080/14786410600899142.

90. Shen, T.; Li, L.-M.; Xu, Z.-Y.; Wang, Y.-D.; Xie, W.-D. Julichrome Derivatives and Gliotoxin from a Soil Derived *Streptomyces* Sp. *Nat. Prod. Res.* **2021**, *35*, 34–40, doi:10.1080/14786419.2019.1611814.

91. Zhou, B.; Hu, Z.-J.; Zhang, H.-J.; Li, J.-Q.; Ding, W.-J.; Ma, Z.-J. Bioactive Staurosporine Derivatives from the *Streptomyces* Sp. NB-A13. *Bioorg. Chem.* **2019**, *82*, 33–40, doi:10.1016/j.bioorg.2018.09.016.

92. Huang, Y.; Yang, D.; Pan, G.; Tang, G.-L.; Shen, B. Characterization of LnmO as a Pathway-Specific Crp/Fnr-Type Positive Regulator for Leinamycin Biosynthesis in *Streptomyces Atroolivaceus* and Its Application for Titer Improvement. *Appl. Microbiol. Biotechnol.* **2016**, *100*, 10555–10562, doi:10.1007/s00253-016-7864-2.

93. Sun, Y.; Takada, K.; Nogi, Y.; Okada, S.; Matsunaga, S. Lower Homologues of Ahpatinin, Aspartic Protease Inhibitors, from a Marine *Streptomyces* Sp. *J. Nat. Prod.* **2014**, *77*, 1749–1752, doi:10.1021/np500337m.

94. Chen, Y.-L.; Zhao, J.; Liu, W.; Gao, J.-F.; Tao, L.-M.; Pan, H.-X.; Tang, G.-L. Identification of Phoslactomycin Biosynthetic Gene Clusters from *Streptomyces Platensis* SAM-0654 and Characterization of PnR1 and PnR2 as Positive Transcriptional Regulators. *Gene* **2012**, *509*, 195–200, doi:10.1016/j.gene.2012.08.030.

95. González, A.; Remsing, L.L.; Lombó, F.; Fernández, M.J.; Prado, L.; Braña, A.F.; Künzel, E.; Rohr, J.; Méndez, C.; Salas, J.A. The MtmVUC Genes of the Mithramycin Gene Cluster in *Streptomyces Argillaceus* Are Involved in the Biosynthesis of the Sugar Moieties. *Mol. Gen. Genet.* **2001**, *264*, 827–835, doi:10.1007/s004380000372.

96. Aharonowitz, Y.; Av-Gay, Y.; Schreiber, R.; Cohen, G. Characterization of a Broad-Range Disulfide Reductase from *Streptomyces Clavuligerus* and Its Possible Role in Beta-Lactam Antibiotic Biosynthesis. *J. Bacteriol.* **1993**, *175*, 623–629, doi:10.1128/jb.175.3.623-629.1993.

97. Lauterbach, L.; Dickschat, J.S. Sesquiterpene Synthases for Bungoene, Pentalenene and Epi -Isozizaene from *Streptomyces Bungoensis*. *Org. Biomol. Chem.* **2020**, *18*, 4547–4550, doi:10.1039/D0OB00606H.

98. Willems, A.R.; Tahlan, K.; Taguchi, T.; Zhang, K.; Lee, Z.Z.; Ichinose, K.; Junop, M.S.; Nodwell, J.R. Crystal Structures of the *Streptomyces Coelicolor* TetR-Like Protein ActR Alone and in Complex with Actinorhodin or the Actinorhodin Biosynthetic Precursor (S)-DNPA. *J. Mol. Biol.* **2008**, *376*, 1377–1387, doi:10.1016/j.jmb.2007.12.061.

99. Gondry, M.; Lautru, S.; Fusai, G.; Meunier, G.; Menez, A.; Genet, R. Cyclic Dipeptide Oxidase from *Streptomyces Noursei* Isolation, Purification and Partial Characterization of a Novel, Amino Acyl Alpha,Beta-Dehydrogenase. *Eur. J. Biochem.* **2001**, *268*, 1712–1721, doi:10.1046/j.1432-1033.2001.02038.x.

100. Xu, Z.; Fang, S.-M.; Bakowski, M.A.; Rateb, M.E.; Yang, D.; Zhu, X.; Huang, Y.; Zhao, L.-X.; Jiang, Y.; Duan, Y.; et al. Discovery of Kirromycins with Anti- Wolbachia Activity from *Streptomyces* Sp. CB00686. *ACS Chem. Biol.* **2019**, *14*, 1174–1182, doi:10.1021/acschembio.9b00086.

101. Eida, A.A.; Mahmud, T. The Secondary Metabolite Pactamycin with Potential for Pharmaceutical Applications: Biosynthesis and Regulation. *Appl. Microbiol. Biotechnol.* **2019**, *103*, 4337–4345, doi:10.1007/s00253-019-09831-x.

102. Li, B.; Wever, W.J.; Walsh, C.T.; Bowers, A.A. Dithiolopyrrolones: Biosynthesis, Synthesis, and Activity of a Unique Class of Disulfide-Containing Antibiotics. *Nat. Prod. Rep.* **2014**, *31*, 905–923, doi:10.1039/C3NP70106A.

103. Dieter, A.; Hamm, A.; Fiedler, H.-P.; Goodfellow, M.; Müller, W.E.G.; Brun, R.; Beil, W.; Bringmann, G. Pyrocoll, an Antibiotic, Antiparasitic and Antitumor Compound Produced by a Novel Alkaliphilic *Streptomyces* Strain. *J. Antibiot. (Tokyo).* **2003**, *56*, 639–646, doi:10.7164/antibiotics.56.639.

104. Song, J.Y.; Yoo, Y.J.; Lim, S.-K.; Cha, S.H.; Kim, J.-E.; Roe, J.-H.; Kim, J.F.; Yoon, Y.J. Complete Genome Sequence of *Streptomyces Venezuelae* ATCC 15439, a Promising Cell Factory for Production of Secondary Metabolites. *J. Biotechnol.* **2016**, *219*, 57–58, doi:10.1016/j.jbiotec.2015.12.028.

105. Wu, C.; Zhu, H.; van Wezel, G.P.; Choi, Y.H. Metabolomics-Guided Analysis of Isocoumarin Production by *Streptomyces* Species MBT76 and Biotransformation of Flavonoids and Phenylpropanoids. *Metabolomics* **2016**, *12*, 90, doi:10.1007/s11306-016-1025-6.

106. Kibret, M.; Guerrero-Garzón, J.F.; Urban, E.; Zehl, M.; Wronski, V.-K.; Rückert, C.; Busche, T.; Kalinowski, J.; Rollinger, J.M.; Abate, D.; et al. *Streptomyces* Spp. From Ethiopia Producing Antimicrobial Compounds: Characterization via Bioassays, Genome Analyses, and Mass Spectrometry. *Front. Microbiol.* **2018**, *9*, doi:10.3389/fmicb.2018.01270.

107. Hu, Z.; Qin, L.; Wang, Q.; Ding, W.; Chen, Z.; Ma, Z. Angucycline Antibiotics and Its Derivatives from Marine-Derived Actinomycete *Streptomyces* Sp. A6H. *Nat. Prod. Res.* **2016**, *30*, 2551–2558, doi:10.1080/14786419.2015.1120730.

108. Zhang, M.; Yang, C.L.; Xiao, Y.S.; Zhang, B.; Deng, X.Z.; Yang, L.; Shi, J.; Wang, Y.S.; Li, W.; Jiao, R.H.; et al. Aurachin SS, a New Antibiotic from *Streptomyces* Sp. NA04227. *J. Antibiot. (Tokyo).* **2017**, *70*, 853–855, doi:10.1038/ja.2017.50.

109. Shao, L.; Huang, J.J.; Yu, Y.; Li, M.X.; Pu, T.; Kan, S.D.; Chen, D.J. Improvement of 7 α -Methoxycephalosporins Production by Overexpression of CmcJ and CmcI Controlled by Promoter ErmEp * in *Streptomyces Clavuligerus*. *J. Appl. Microbiol.* **2014**, *117*, 1645–1654, doi:10.1111/jam.12640.

110. Challis, G.L.; Ravel, J. Coelichelin, a New Peptide Siderophore Encoded by the *Streptomyces Coelicolor* Genome: Structure Prediction from the Sequence of Its Non-Ribosomal Peptide Synthetase. *FEMS Microbiol. Lett.* **2000**, *187*, 111–114, doi:10.1111/j.1574-6968.2000.tb09145.x.

111. Wang, Z.-X.; Li, S.-M.; Heide, L. Identification of the Coumermycin A 1 Biosynthetic Gene Cluster of *Streptomyces Rishiriensis* DSM 40489. *Antimicrob. Agents Chemother.* **2000**, *44*, 3040–3048, doi:10.1128/AAC.44.11.3040-3048.2000.

112. Driller, R.; Garbe, D.; Mehlmer, N.; Fuchs, M.; Raz, K.; Major, D.T.; Brück, T.; Loll, B. Current Understanding and Biotechnological Application of the Bacterial Diterpene Synthase CotB2. *Beilstein J. Org. Chem.* **2019**, *15*, 2355–2368, doi:10.3762/bjoc.15.228.

113. Kubiak, R.L.; Phillips, R.K.; Zmudka, M.W.; Ahn, M.R.; Maka, E.M.; Pyeatt, G.L.; Roggensack, S.J.; Holden, H.M. Structural and Functional Studies on a 3′-Epimerase Involved in the Biosynthesis of DTDP-6-Deoxy- D-Allose. *Biochemistry* **2012**, *51*, 9375–9383, doi:10.1021/bi3012737.

114. Blanco, G.; Patallo, E.P.; Braña, A.F.; Trefzer, A.; Bechthold, A.; Rohr, J.; Méndez, C.; Salas, J.A. Identification of a Sugar Flexible Glycosyltransferase from *Streptomyces Olivaceus*, the Producer of the Antitumor Polyketide Elloramycin. *Chem. Biol.* **2001**, *8*, 253–263, doi:10.1016/S1074-5521(01)00010-2.

115. Fan, Y.-T.; Chung, K.-R.; Huang, J.-W. Fungichromin Production by *Streptomyces Padanus* PMS-702 for Controlling Cucumber Downy Mildew. *Plant Pathol. J.* **2019**, *35*, 341–350, doi:10.5423/PPJ.OA.03.2019.0057.

116. Hoffarth, E.R.; Kong, S.; He, H.-Y.; Ryan, K.S. An Engineered Biosynthetic–Synthetic Platform for Production of Halogenated Indolmycin Antibiotics. *Chem. Sci.* **2021**, *12*, 8817–8821, doi:10.1039/D0SC05843B.

117. Lim, S.-K.; Ju, J.; Zazopoulos, E.; Jiang, H.; Seo, J.-W.; Chen, Y.; Feng, Z.; Rajski, S.R.; Farnet, C.M.; Shen, B. Iso-Migrastatin, Migrastatin, and Dorrigocin Production in *Streptomyces Platensis* NRRL 18993 Is Governed by a Single Biosynthetic Machinery Featuring an Acyltransferase-Less Type I Polyketide Synthase. *J. Biol. Chem.* **2009**, *284*, 29746–29756, doi:10.1074/jbc.M109.046805.

118. Frenzel, T.; Zhou, P.; Floss, H.G. Formation of 2-Methyltryptophan in the Biosynthesis of Thiostrepton: Isolation of S-Adenosylmethionine: Tryptophan 2-Methyltransferase. *Arch. Biochem. Biophys.* **1990**, *278*, 35–40, doi:10.1016/0003-9861(90)90227-P.

119. Xue, Y.; Zhao, L.; Liu, H.; Sherman, D.H. A Gene Cluster for Macrolide Antibiotic Biosynthesis in *Streptomyces Venezuelae* : Architecture of Metabolic Diversity. *Proc. Natl. Acad. Sci.* **1998**, *95*, 12111–12116, doi:10.1073/pnas.95.21.12111.

120. Bihlmaier, C.; Welle, E.; Hofmann, C.; Welzel, K.; Vente, A.; Breitling, E.; Müller, M.; Glaser, S.; Bechthold, A. Biosynthetic Gene Cluster for the Polyenoyltetramic Acid α-Lipomycin. *Antimicrob. Agents Chemother.* **2006**, *50*, 2113–2121, doi:10.1128/AAC.00007-06.

121. Park, J.-H.; Roe, J.-H. Mycothiol Regulates and Is Regulated by a Thiol-Specific Antisigma Factor RsrA and σ R in *Streptomyces Coelicolor*. *Mol. Microbiol.* **2008**, *68*, 861–870, doi:10.1111/j.1365-2958.2008.06191.x.

122. Su, C.; Yan, Y.; Guo, X.; Luo, J.; Liu, C.; Zhang, Z.; Xiang, W.-S.; Huang, S.-X. Characterization of the N -Methyltransferases Involved in the Biosynthesis of Toxoflavin, Fervenulin and Reumycin from *Streptomyces Hiroshimensis* ATCC53615. *Org. Biomol. Chem.* **2019**, *17*, 477–481, doi:10.1039/C8OB02847H.

123. Cao, D.T.; Tran, V.H.; Vu, V.N.; Mai, H.D.T.; Le, T.H.M.; Vu, T.Q.; Nguyen, H.H.; Chau, V.M.; Pham, V.C. Antimicrobial Metabolites from a Marine-Derived Actinomycete *Streptomyces* Sp. G278. *Nat. Prod. Res.* **2019**, *33*, 3223–3230, doi:10.1080/14786419.2018.1468331.

124. Wahaab, F.; Subramaniam, K. Bioprospecting Marine Actinomycetes for Multidrug-Resistant Pathogen Control from Rameswaram Coastal Area, Tamil Nadu, India. *Arch. Microbiol.* **2018**, *200*, 57–71, doi:10.1007/s00203-017-1417-7.

125. Li, Z.; Hu, F.; Ye, R.; Lv, H.; Zeng, J. Influence of Al 3+ on the Titer of Spiramycin and Effective Components in Fermentor. *Prep. Biochem. Biotechnol.* **2017**, *47*, 481–488, doi:10.1080/10826068.2017.1292290.

126. Chaudhary, A.K.; Dhakal, D.; Sohng, J.K. An Insight into the “-Omics” Based Engineering of Streptomycetes for Secondary Metabolite Overproduction. *Biomed Res. Int.* **2013**, *2013*, 1–15, doi:10.1155/2013/968518.

127. Kharel, M.K.; Basnet, D.B.; Lee, H.C.; Liou, K.; Woo, J.S.; Kim, B.-G.; Sohng, J.K. Isolation and Characterization of the Tobramycin Biosynthetic Gene Cluster from *Streptomyces Tenebrarius*. *FEMS Microbiol. Lett.* **2004**, *230*, 185–190, doi:10.1016/S0378-1097(03)00881-4.

128. Berger, H.; Bacher, M.; Labuda, R.; Eppel, I.M.; Bayer, F.; Sulyok, M.; Gasparotto, E.; Zehetbauer, F.; Doppler, M.; Gratzl, H.; et al. Polaramycin B, and Not Physical Interaction, Is the Signal That Rewires Fungal Metabolism in the *Streptomyces*–*Aspergillus* Interaction. *Environ. Microbiol.* **2022**, *24*, 4899–4914, doi:10.1111/1462-2920.16118.

129. Tan, L.T.; Mahendra, C.K.; Yow, Y.; Chan, K.; Khan, T.M.; Lee, L.; Goh, B. *Streptomyces* Sp. MUM273b: A Mangrove‐derived Potential Source for Antioxidant and UVB Radiation Protectants. *Microbiologyopen* **2019**, *8*, doi:10.1002/mbo3.859.

130. Noda, S.; Miyazaki, T.; Miyoshi, T.; Miyake, M.; Okai, N.; Tanaka, T.; Ogino, C.; Kondo, A. Cinnamic Acid Production Using *Streptomyces Lividans* Expressing Phenylalanine Ammonia Lyase. *J. Ind. Microbiol. Biotechnol.* **2011**, *38*, 643–648, doi:10.1007/s10295-011-0955-2.

131. Erb, A.; Krauth, C.; Luzhetskyy, A.; Bechthold, A. Differences in the Substrate Specificity of Glycosyltransferases Involved in Landomycins A and E Biosynthesis. *Appl. Microbiol. Biotechnol.* **2009**, *83*, 1067–1076, doi:10.1007/s00253-009-1993-9.

132. Xu, Z.; Tian, P. Rethinking Biosynthesis of Aclacinomycin A. *Molecules* **2023**, *28*, 2761, doi:10.3390/molecules28062761.

133. Schorn, M.; Zettler, J.; Noel, J.P.; Dorrestein, P.C.; Moore, B.S.; Kaysser, L. Genetic Basis for the Biosynthesis of the Pharmaceutically Important Class of Epoxyketone Proteasome Inhibitors. *ACS Chem. Biol.* **2014**, *9*, 301–309, doi:10.1021/cb400699p.

134. Vilches, C.; Mendez, C.; Hardisson, C.; Salas, J.A. Biosynthesis of Oleandomycin by *Streptomyces Antibioticus*: Influence of Nutritional Conditions and Development of Resistance. *J. Gen. Microbiol.* **1990**, *136*, 1447–1454, doi:10.1099/00221287-136-8-1447.

135. Yang, C.-L.; Wang, Y.-S.; Liu, C.-L.; Zeng, Y.-J.; Cheng, P.; Jiao, R.-H.; Bao, S.-X.; Huang, H.-Q.; Tan, R.-X.; Ge, H.-M. Strepchazolins A and B: Two New Alkaloids from a Marine *Streptomyces Chartreusis* NA02069. *Mar. Drugs* **2017**, *15*, 244, doi:10.3390/md15080244.

136. Tetzlaff, C.N.; You, Z.; Cane, D.E.; Takamatsu, S.; Omura, S.; Ikeda, H. A Gene Cluster for Biosynthesis of the Sesquiterpenoid Antibiotic Pentalenolactone in *Streptomyces Avermitilis*. *Biochemistry* **2006**, *45*, 6179–6186, doi:10.1021/bi060419n.

137. Salla, T.D.; Astarita, L. V.; Santarém, E.R. Defense Responses in Plants of Eucalyptus Elicited by *Streptomyces* and Challenged with *Botrytis Cinerea*. *Planta* **2016**, *243*, 1055–1070, doi:10.1007/s00425-015-2460-8.

138. Rani, R.; Arora, S.; Kaur, J.; Manhas, R.K. Phenolic Compounds as Antioxidants and Chemopreventive Drugs from *Streptomyces Cellulosae* Strain TES17 Isolated from Rhizosphere of *Camellia Sinensis*. *BMC Complement. Altern. Med.* **2018**, *18*, 82, doi:10.1186/s12906-018-2154-4.

139. Ser, H.-L.; Palanisamy, U.D.; Yin, W.-F.; Abd Malek, S.N.; Chan, K.-G.; Goh, B.-H.; Lee, L.-H. Presence of Antioxidative Agent, Pyrrolo[1,2-a]Pyrazine-1,4-Dione, Hexahydro- in Newly Isolated *Streptomyces Mangrovisoli* Sp. Nov. *Front. Microbiol.* **2015**, *6*, doi:10.3389/fmicb.2015.00854.

140. Shindo-Okada, N.; Makabe, O.; Nagahara, H.; Nishimura, S. Permanent Conversion of Mouse and Human Cells Transformed by Activatedras Orraf Genes to Apparently Normal Cells by Treatment with the Antibiotic Azatyrosine. *Mol. Carcinog.* **1989**, *2*, 159–167, doi:10.1002/mc.2940020309.

141. Thirumalairaj, J.; Sivasankari, K.; Natarajaseenivasan, K.; Balagurunathan, R. Potential Anti-Leptospiral Compound, Leptomycin B from Marine *Streptomyces Indiaensis* MSU5: Taxonomy, Fermentation, Compound Isolation, in Vitro and in Vivo Efficacy. *World J. Microbiol. Biotechnol.* **2017**, *33*, 187, doi:10.1007/s11274-017-2351-1.

142. Zhan, Y.; Zheng, S. Efficient Production of Nonactin by *Streptomyces Griseus Subsp. Griseus*. *Can. J. Microbiol.* **2016**, *62*, 711–714, doi:10.1139/cjm-2016-0248.

143. Dame, Z.T.; Islam, M.T.; Helmke, E.; von Tiedemann, A.; Laatsch, H. Oligomycins and Pamamycin Homologs Impair Motility and Induce Lysis of Zoospores of the Grapevine Downy Mildew Pathogen, Plasmopara Viticola. *FEMS Microbiol. Lett.* **2016**, *363*, fnw167, doi:10.1093/femsle/fnw167.

144. Marín, L.; Gutiérrez-del-Río, I.; Entrialgo-Cadierno, R.; Villar, C.J.; Lombó, F. De Novo Biosynthesis of Myricetin, Kaempferol and Quercetin in *Streptomyces Albus* and *Streptomyces Coelicolor*. *PLoS One* **2018**, *13*, e0207278, doi:10.1371/journal.pone.0207278.

145. Ding, N.; Han, L.; Jiang, Y.; Li, G.; Liu, J.; Mu, Y.; Huang, X. Sesquiterpenoids from *Streptomyces Anulatus* Isolated from Giraffa Camelopardalis Feces. *Magn. Reson. Chem.* **2018**, *56*, 352–359, doi:10.1002/mrc.4709.

146. Hirata, Y.; Nakata, H.; Yamada, K.; Okuhara, K.; Naito, T. The Structure of Aureothin, a Nitro Compound Obtained from *Streptomyces Thioluteus*. *Tetrahedron* **1961**, *14*, 252–274, doi:10.1016/S0040-4020(01)92175-1.

147. Ahsan, T.; Chen, J.; Zhao, X.; Irfan, M.; Wu, Y. Extraction and Identification of Bioactive Compounds (Eicosane and Dibutyl Phthalate) Produced by *Streptomyces* Strain KX852460 for the Biological Control of Rhizoctonia Solani AG-3 Strain KX852461 to Control Target Spot Disease in Tobacco Leaf. *AMB Express* **2017**, *7*, 54, doi:10.1186/s13568-017-0351-z.

148. Zhou, W.-W.; Ma, B.; Tang, Y.-J.; Zhong, J.-J.; Zheng, X. Enhancement of Validamycin A Production by Addition of Ethanol in Fermentation of *Streptomyces Hygroscopicus* 5008. *Bioresour. Technol.* **2012**, *114*, 616–621, doi:10.1016/j.biortech.2012.03.124.
